# Supplementary material for: Effectiveness and safety of early intramuscular botulinum toxin injections to prevent shoulder deformity in babies with brachial plexus birth injury (POPB-TOX), a randomised controlled trial: study protocol
Source: PubMed Central journal article supplement — BMJ Open. 2019 Sep 30;9(9):e032901. doi: 10.1136/bmjopen-2019-032901 (PMC6773354; doi:10.1136/bmjopen-2019-032901), 2019-09-30
Supplement: bmjopen-2019-032901.draft_revisions.pdf [file bmjopen-2019-032901.draft_revisions.pdf]

# BMJ Open

BMJ Open is committed to open peer review. As part of this commitment we make the peer review history of every article we publish publicly available.

When an article is published we post the peer reviewers' comments and the authors' responses online. We also post the versions of the paper that were used during peer review. These are the versions that the peer review comments apply to.

The versions of the paper that follow are the versions that were submitted during the peer review process. They are not the versions of record or the final published versions. They should not be cited or distributed as the published version of this manuscript.

BMJ Open is an open access journal and the full, final, typeset and author-corrected version of record of the manuscript is available on our site with no access controls, subscription charges or pay-per-view fees (<http://bmjopen.bmj.com>).

If you have any questions on BMJ Open's open peer review process please email [info.bmjopen@bmj.com](mailto:info.bmjopen@bmj.com)

# BMJ Open

## Effectiveness and safety of early intramuscular botulinum toxin injections to prevent shoulder deformity in babies with brachial plexus birth injury (POPB-TOX), a randomized controlled trial: study protocol

|                               |                                                                                                                                                                                                                                                                                                                                                                                                                                                                                                                                                                                                                                                                                                                                                                                                                                                                                                                                                                                                                                       |
|-------------------------------|---------------------------------------------------------------------------------------------------------------------------------------------------------------------------------------------------------------------------------------------------------------------------------------------------------------------------------------------------------------------------------------------------------------------------------------------------------------------------------------------------------------------------------------------------------------------------------------------------------------------------------------------------------------------------------------------------------------------------------------------------------------------------------------------------------------------------------------------------------------------------------------------------------------------------------------------------------------------------------------------------------------------------------------|
| Journal:                      | <i>BMJ Open</i>                                                                                                                                                                                                                                                                                                                                                                                                                                                                                                                                                                                                                                                                                                                                                                                                                                                                                                                                                                                                                       |
| Manuscript ID                 | bmjopen-2019-032901                                                                                                                                                                                                                                                                                                                                                                                                                                                                                                                                                                                                                                                                                                                                                                                                                                                                                                                                                                                                                   |
| Article Type:                 | Protocol                                                                                                                                                                                                                                                                                                                                                                                                                                                                                                                                                                                                                                                                                                                                                                                                                                                                                                                                                                                                                              |
| Date Submitted by the Author: | 12-Jul-2019                                                                                                                                                                                                                                                                                                                                                                                                                                                                                                                                                                                                                                                                                                                                                                                                                                                                                                                                                                                                                           |
| Complete List of Authors:     | <p>Pons, Christelle; Fondation ILDYS; Laboratory of Medical Information Processing, INSERM UMR 1101<br/> Eddi, Dauphou; CHRU de Brest<br/> Le Gal, G.; Centre Hospitalier Universitaire de Brest, Centre for Clinical Investigation INSERM CIC 1412<br/> Garetier, Marc; Hopital d'Instruction des Armees Clermont-Tonnerre, Radiology; Laboratory of Medical Information Processing, INSERM UMR 1101<br/> Ben Salem, Douraied; CHRU de Brest, Radiology; Laboratory of Medical Information Processing, INSERM UMR 1101<br/> Houx, Laetitia; Centre Hospitalier Universitaire de Brest, Physical Medicine and Rehabilitation Department, Brest, France<br/> Fitoussi, Franck; Hopital Armand-Trousseau<br/> Quintero, Nathaly; Hopitaux de Saint-Maurice, Physical Medicine and Rehabilitation<br/> Brochard, Sylvain; Centre Hospitalier Universitaire de Brest, Physical Medicine and Rehabilitation Department, Brest, France; Laboratory of Medical Information Processing, INSERM UMR 1101<br/> POPBtox group, POPBtox group</p> |
| Keywords:                     | brachial plexus birth injury, Shoulder < ORTHOPAEDIC & TRAUMA SURGERY, botulinum toxin, bone deformity                                                                                                                                                                                                                                                                                                                                                                                                                                                                                                                                                                                                                                                                                                                                                                                                                                                                                                                                |
|                               |                                                                                                                                                                                                                                                                                                                                                                                                                                                                                                                                                                                                                                                                                                                                                                                                                                                                                                                                                                                                                                       |

SCHOLARONE™  
Manuscripts

1  
2  
3 **Effectiveness and safety of early intramuscular botulinum toxin injections**  
4 **to prevent shoulder deformity in babies with brachial plexus birth injury**  
5 **(POPB-TOX), a randomized controlled trial: study protocol**  
6  
7  
8  
9

10  
11 Christelle Pons MD, PhD<sup>1,2,3</sup> ; Dauphou Eddi PhD<sup>4</sup> ; Grégoire le Gal MD, PhD<sup>5</sup> ; Marc  
12 Garetier MD<sup>2,6</sup> ; Douraied Ben Salem MD, PhD<sup>2,7,8</sup> ; Laetitia Houx MD<sup>1,2,3</sup> ; Franck Fitoussi  
13 MD, PhD<sup>9</sup> ; Nathaly Quintero MD<sup>10</sup> ; Sylvain Brochard MD, PhD<sup>1,2,3,8</sup> ; and the POPB-TOX  
14 Group (Marianne Alison, Madeleine Aslan, Jennifer Bastien, Gilles Dautel, Floriane Colin, Marion  
15 Delpont, Bruno Dohin, Marie Agnes Galloy, Vincent Gautheron Salem Hassan Al Khoury, Pascal  
16 Jehanno , Mélanie Kaas, Olivier Prodhomme, Mélanie Porte, Anne Gaelle Py, Helène  
17 Rauscent, Emilie Rumilly, Katherine Sanchez Barr , Catherine Tréguier, and Philippe Violas )  
18  
19

- 20  
21  
22 1 Pediatric rehabilitation, Fondation ILDYS, Brest, France  
23 2 Laboratory of Medical Information Processing, INSERM 1101, Brest, France  
24 3 PMR department, Brest CHRU, Brest, France  
25 4 DRCI, Brest CHRU, Brest, France  
26 5 Centre for Clinical Investigation INSERM CIC 1412, Brest CHRU, Brest, France  
27 6 Radiology department, hôpital d'Instruction des Armées Clermont-Tonnerre, Brest,  
28 France  
29 7 Radiology department, Brest CHRU, Brest, France  
30 8 Université de Bretagne Occidentale, Brest, France  
31 9 CHU Paris Est - Hôpital d'Enfants Armand-Trousseau; Paris, France  
32 10 Hôpitaux de St Maurice, St Maurice, France  
33  
34  
35

36 Corresponding author

37 Christelle Pons

38 SSR pédiatrique brestois, Fondation ILDYS, rue Alain Colas, 29200 Brest

39 Tel : 0256310145

40 [christelle.ponsbecmeur@ildys.org](mailto:christelle.ponsbecmeur@ildys.org)  
41  
42

43 Word count : 5396  
44  
45  
46  
47  
48  
49  
50  
51  
52  
53  
54  
55  
56  
57  
58  
59  
60

## ABSTRACT

### Introduction

In children with Brachial Plexus Birth Injury (BPBI), denervation of the shoulder muscles leads to bony deformity in the first months of life, reducing active and passive range of motion (ROM), and causing activity limitation. The aim of this multicentre randomised controlled trial is to evaluate the effectiveness of botulinum toxin injections (BTI) in the shoulder internal rotator muscles of 12 month-old babies in limiting the progression of posterior subluxation of the glenohumeral joint, compared with a sham procedure mimicking BTI. The secondary aims are to evaluate the effectiveness of BTI in (I) limiting the progression of glenoid retroversion and 3D deformity and (II) improving shoulder range of motion and upper limb function, as well as to confirm the tolerance of BTI.

### Methods and analysis

Sixty-two babies with unilateral BPBI and a risk of posterior humeral head subluxation will be included. Only those with at least 7% posterior subluxation of the humeral head compared with the contralateral shoulder on the MRI will be randomized to one of two groups: “BTI” and “Sham”. The BTI group will receive BOTOX injections at the age of 12 months in the internal shoulder rotator muscles (8UI/kg). The sham group will undergo a sham BTI procedure. Both groups will undergo repeated shoulder MRI at 18 months of age to quantify changes in the percentage of posterior migration of the humeral head (primary outcome), glenoid version and 3D bone deformity. Clinical evaluations (passive shoulder range of motion, Active Movement Scale) will be carried out at baseline and 15 and 18 months of age. The mini Assisting Hand Assessment will be rated between 10 and 11 months, and at 18 months of age. Adverse events will be recorded at least monthly for each child.

### Ethics and dissemination

Full ethical approval for this study has been obtained.

### Trial registration number

EudraCT: 2015-001402-34 in European Clinical Trial database; NCT03198702 in Clinical Trial database.

Keywords: Brachial Plexus Birth Injury, shoulder, botulinum toxin, bone deformity

### Strengths and limitations of this study

We expect botulinum toxin injections to limit shoulder deformity and improve shoulder range of motion in children with brachial plexus birth injury.

35 This randomized controlled study will evaluate the safety and effectiveness of early botulinum  
36 toxin injections in the shoulder internal rotator muscles.

37 The effect on bony deformities (glenohumeral subluxation and glenoid version), active and  
38 passive range of motion and upper limb function will be evaluated.

39

40

## 41 INTRODUCTION

42

43

44 Brachial Plexus Birth Injury (BPBI) refers to injury to one or more cervical nerve roots  
45 (C5-C8) and/or the first thoracic nerve root (T1), usually caused by traction during a difficult  
46 birth. The incidence is around 1.5 per 1000 births[1]. In one third of cases, nerve recovery is  
47 incomplete or absent[1,2], resulting in permanent impairment which in turn may lead to activity  
48 limitation and participation as defined by the International Classification of Functioning[3,4].

49 BPBI greatly affects the musculoskeletal development of the shoulder complex[3,5,6].  
50 Deformities occur very early, within the months following birth[6–8], and gradually worsen  
51 with the child's growth[7,9]. Bony and joint deformities are caused by the partial denervation  
52 of the shoulder muscles, which results in an imbalance of the forces acting on the glenohumeral  
53 joint [6,10]. In particular, there is often a dominance of the internal rotator muscles [11,12].  
54 Excess glenoid retroversion is typical, along with deformation of the glenoid fossa. This allows  
55 posterior migration of the humeral head to occur, eventually progressing to complete  
56 subluxation[6–8,13]. These deformities increase the risk of early degenerative joint changes  
57 and pain during childhood and adulthood[14,15]. Active and passive shoulder range of motion  
58 (ROM) are also reduced, causing a vicious circle in which the muscles cannot contract  
59 effectively because of the bony deformities and altered lever arms [9]. These changes reduce  
60 the functional capacity and quality of life of children with BPBI[16,17].

61 Botulinum toxin injections (BTI) are a common treatment to reduce muscle activity. This  
62 treatment is mostly used to treat spasticity in children, particularly in the case of cerebral  
63 palsy[18], however it may also be useful in children with BPBI[19,20], combined with other  
64 treatments such as physiotherapy, occupational therapy, orthoses and, in some cases, surgery.  
65 The dominant internal shoulder rotator muscles are often targeted in order reduce the strength  
66 imbalance between agonist and antagonist muscles [21]. One study suggested that BTI might  
67 be useful to reduce posterior subluxation or dislocation of the shoulder in babies with BPBI[22].  
68 BTI could also improve passive and active shoulder ROM and functional capacity[20,23,24].  
69 BTI is a minimally invasive treatment that is well tolerated in young children [25]. When used

1  
2  
3 70 prior to surgery, it could avert or reduce the complexity of surgical secondary orthopaedic  
4  
5 71 procedures (e. g. subscapularis release, latissimus dorsi and teres major transfers ) [22,23].  
6  
7 72 Although the results of studies of early BTI for BPBI are encouraging, most studies are  
8  
9 73 retrospective, include small samples and do not have a control group. The current level of  
10  
11 74 evidence is thus insufficient to make robust conclusions regarding the effectiveness of  
12  
13 75 botulinum toxin injections in children with brachial plexus birth injury.

14 76 Randomized controlled trials to evaluate the efficacy of early BTI and to confirm its  
15  
16 77 tolerance in children with BPBI are therefore now warranted. With regard to the control  
17  
18 78 treatment, a sham procedure mimicking BTI without injection is ethically more appropriate  
19  
20 79 than an invasive placebo procedure because of the young age of the children involved.  
21  
22 80

## 22 81 **AIMS and HYPOTHESES**

### 23 82 24 83 **Aims**

25  
26 84 The main aim of this study is to evaluate the effectiveness of BTI in the internal shoulder  
27  
28 85 rotator muscles of 12 month-old babies in limiting the progression of posterior subluxation of  
29  
30 86 the glenohumeral joint.

31  
32 87 The secondary aims are (I) to compare the effectiveness of BTI with a sham treatment  
33  
34 88 in limiting the progression of glenoid retroversion and three-dimensional glenoid deformity;  
35  
36 89 (II) to compare the effectiveness of BTI with a sham treatment in improving active and passive  
37  
38 90 joint range of motion and upper limb function; (III) to assess the tolerance of BTI in babies with  
39  
40 91 BPBI; (IV) to evaluate the effects of BTI on muscle growth and fatty infiltration of the injected  
41  
42 92 muscles, as well as muscle volume balance around the shoulder, and (V) to determine the long-  
43  
44 93 term effect of BTI on frequency and type of surgical interventions.  
45  
46 94

### 46 95 **Hypotheses**

47  
48 96 Our primary hypothesis is that BTI will limit posterior subluxation of the glenohumeral  
49  
50 97 joint in the BTI group compared with the Sham group.

51  
52 98 We further hypothesize that the progression of glenoid retroversion and three-  
53  
54 99 dimensional deformities will be reduced, that active and passive range of motion will be  
55  
56 100 increased, and that number of secondary surgical interventions will be reduced in the BTI group  
57  
58 101 compared with the Sham group. The robust design of this study will confirm the results of  
59  
60 102 previous un-controlled studies, providing a strong level of evidence for BTI treatment. We also  
103  
104 103 hypothesize that BTI will be well tolerated by the babies [25]. With regards to morphological

1  
2  
3 104 changes following BTI, we expect slight atrophy to occur in the injected muscles, with some  
4 105 fatty infiltration [26] but no change in non-injected muscles, leading to an improvement in the  
5 106 volume balance of agonist and antagonist muscles [27].  
6  
7  
8  
9

## 10 108 **METHODS/DESIGN**

### 11 109 12 110 **Design**

13 111 A randomised, multicentre, double-blind, controlled, parallel group, superiority trial  
14 112 will be performed (version 3, 17.01.2018). One group will receive BTI and the other will  
15 113 undergo a Sham procedure.  
16  
17  
18  
19  
20  
21

### 22 115 **Ethics**

23 116 Full ethical approval for this study has been obtained by the ethical committee Ouest 1  
24 117 of Tours and Agence Nationale de Sécurité du Médicament et des produits de santé (ANSM).  
25 118 The trial has been registered in the European Clinical Trial database (EudraCT: 2015-001402-  
26 119 34) and Clinical Trial database (NCT03198702). All families will be given a written  
27 120 information letter detailing the study and parents or guardians will sign informed consent prior  
28 121 to the child's inclusion. Any modification or amendment to the protocol will be submitted to  
29 122 the ethical committees and ANSM for approval. After approval, investigators and trial  
30 123 participants will be informed of the changes by letter or email. All trial databases will also be  
31 124 updated.  
32  
33  
34  
35  
36  
37  
38  
39  
40

### 41 126 **Recruitment**

42 127 The sponsor is CHRU Brest. Babies will be recruited from six French hospitals (CHRU  
43 128 Brest, Centre de Réadaptation pour enfant Flavigny-sur-Moselle, Hôpital National de Saint  
44 129 Maurice, CHU Saint-Etienne, CHU Nîmes, CHU Rennes), all of which are specialized in the  
45 130 management of children with brachial plexus palsy and have access to MRI. All doctors  
46 131 involved are skilled in BTI. Hospitals were selected by the study coordinator and sponsor based  
47 132 on their responses to a feasibility questionnaire. It is predicted that during the 29 months of  
48 133 inclusion, around 2590 children will be born with BPBI in France [1], of whom 466 will left  
49 134 with sequelae[1]. This study will recruit 13.5% of these babies (62 patients over 29 months).  
50 135 The investigator in each of the specialist participating centres will inform clinicians in local  
51 136 maternity units about the study, and flyers and posters will be displayed in the reception areas  
52 137 of clinics and maternity units. Clinicians will be asked to refer babies with OBBP to their nearest  
53  
54  
55  
56  
57  
58  
59  
60



1  
2  
3 138 participating specialist centre and they will be provided with information leaflets to give to the  
4  
5 139 parents. External advertising will also include a webpage on the Brest CHRU website. If  
6  
7 140 inclusion goals are not achieved, more centers will be asked to participate.

8 141 A rehabilitation physician and/or a surgeon in each participating specialist centre will  
9  
10 142 identify potentially eligible babies for the study during routine consultations. The protocol will  
11  
12 143 be explained and proposed to parents of babies between 10 and 11 months of age who have a  
13  
14 144 high risk of bony deformity. An information letter will be given to the parents (supplementary  
15  
16 145 file). If the parents agree to their baby's participation, and the baby fulfils the inclusion criteria,  
17  
18 146 he or she will be enrolled in the study for 7 months.

19 147 The inclusion criteria are: male or female babies aged between 10 and 11 months with  
20  
21 148 unilateral BPBI; at least one of the following risk factors for posterior subluxation of the  
22  
23 149 humeral head: 10° less passive external ROM of the affected shoulder compared with the  
24  
25 150 contralateral shoulder and/ or a score below 6 on the Active Movement Scale (AMS) for  
26  
27 151 shoulder external rotation and abduction, elbow flexion or supination; whose parents or  
28  
29 152 guardians have signed the consent form. Babies with bilateral BPBI, microsurgery or shoulder  
30  
31 153 muscle surgery planned between 12 and 18 months of age, contraindications to the use of  
32  
33 154 botulinum toxin (hypersensitivity to botulinum toxin or the excipients used, or myasthenia),  
34  
35 155 contraindications to MRI (pace maker, metal implants, foreign metal body in the eye, etc.), MRI  
36  
37 156 not possible in the Paediatric Day Hospital setting because of contraindications to the  
38  
39 157 premedication protocol or organizational constraints, parents inapt to provide consent for the  
40  
41 158 participation of their child, or parents under the age of 18 years, will be excluded.

42

#### 43 160 **Study procedure** (Figure 1 and Table 1)

44 161 At visit 1 (between 10 and 11 months of age), the parents or guardians will sign the  
45  
46 162 informed consent form and the baby will be included. The physician or surgeon will carry out  
47  
48 163 a physical examination and will collect socio-demographic data including history of BPBI in a  
49  
50 164 brother or sister, overweight or obesity of the mother, any medical conditions during the  
51  
52 165 pregnancy (e.g. gestational diabetes), the birth procedure (caesarean section, vaginal delivery  
53  
54 166 with epidural, induction of labour, instrumental delivery, shoulder dystocia, term and duration),  
55  
56 167 birth weight and length, and APGAR score.

57 168 Visit 2 (at 11 months of age) will involve MRI to confirm the diagnosis of bony  
58  
59 169 deformity (the humeral head on the involved side must be at least 7% more posterior than the  
60  
170 humeral head on the contralateral side). Once confirmed, randomisation will be carried out.  
171  
This will ensure that only babies with verified glenohumeral deformity are included, since



1  
2  
3 172 clinical tests are not sufficiently sensitive to confirm this. Babies who do not fulfil this  
4  
5 173 randomisation criterion will be withdrawn from the study and will pursue the usual medical  
6  
7 174 follow-up. The parents will be informed of the results of the MRI within 10 days by means of  
8  
9 175 a telephone call from the research investigators. The randomisation will allocate the babies to  
10  
11 176 one of two treatment groups (each with the same number of babies): BTI group and sham group.

12 177 Visit 3 (12 months +/-15 days of age) will include treatment (BTI or sham procedure).

13 178 Both groups will then attend seven follow up visits: visit 4 will be carried out ten days  
14  
15 179 after treatment administration, and visits 6-10 will be carried out each month until 18 months  
16  
17 180 of age. Visits 1, 7 and 10 will involve a standardized clinical examination by occupational  
18  
19 181 therapists or physiotherapists and visits 5, 6, 8 and 9 will involve a telephone call from a  
20  
21 182 member of the study team.

22 183 Un-blinding will be performed at visit 10 (18-months of age). Following un-blinding,  
23  
24 184 the baby will attend a follow-up visit at 24 months then yearly follow-up visits, as is usual  
25  
26 185 practice. The aim of this is to determine the safety of the use of botulinum toxin before the age  
27  
28 186 of two years (after which there is a marketing authorization for children with cerebral palsy),  
29  
30 187 and to compare the frequency and complexity of surgical interventions between groups until  
31  
32 188 the age of 10 years.

### 33 189

### 34 190 **MRI**

35  
36 191 The babies included in this study will undergo MRI of both shoulders at visits 2 and 10  
37  
38 192 (at 11 and 18 months of age). A three-dimensional, T1-weighted gradient-echo sequence will  
39  
40 193 be used. This anatomical sequence highlights bones and muscles, including denervated  
41  
42 194 muscles[28]. The child will lie supine with his/her arms in neutral and hands pronated. The T1  
43  
44 195 protocol[27] will be adapted in each centre depending on the type of MRI scan they have.  
45  
46 196 Acquisition time will be less than 5 minutes per shoulder. No contrast injection will be required.  
47  
48 197 Images will have to include sternum and spine medially, the whole deltoid laterally and the  
49  
50 198 spine of the scapula at the back down. Premedication (sedation or general anaesthetic) will be  
51  
52 199 necessary for both MRI exams, at 11 and 18 months of age. The premedication will be adapted  
53  
54 200 to the clinical status of each child and the customs of each centre. After premedication, the child  
55  
56 201 will be monitored by a paediatrician in the day hospital of each centre using a validated protocol.

### 57 202

### 58 203 **Randomisation process and blinding**

59 204 Randomisation will be carried out using centralised computer randomisation by Internet,  
60 205 according to the usual procedures in effect at Brest Regional University Hospital. After MRI

1  
2  
3 206 confirmation that the baby fulfils the randomisation criterion (visit 2), randomisation will be  
4  
5 207 performed by the study investigator on the day of the injection visit (visit 3, 12 months of age).  
6  
7 208 Randomization will be carried out via a specific dedicated website ([https://chu-brest.hugo-](https://chu-brest.hugo-online.fr/CSOnline/)  
8  
9 209 [online.fr/CSOnline/](https://chu-brest.hugo-online.fr/CSOnline/)). This website is available 24 hours a day.  
10  
11 210 Stratification will be carried out by centre and by microsurgery prior to inclusion, since early  
12  
13 211 surgery could influence the progression of bony deformity. Only the physician who will  
14  
15 212 perform the BTI and the pharmacist will receive the email specifying the randomization arm of  
16  
17 213 each baby. Neither the parents or guardians, nor the clinical and radiological evaluators will be  
18  
19 214 aware of the treatment administered. The doctors carrying out the BTI will not take part in  
20  
21 215 subsequent visits, to ensure the blinding of the examiner. A central analysis of MRI data will  
22  
23 216 be carried out in order to ensure blinding of the evaluator to the primary outcome measure.

## 24 218 **Study Treatments**

### 25 219 BTI procedure

26  
27 220 The botulinum toxin that will be used in the study is BOTOX (Allergan, Dublin,  
28  
29 221 Ireland). Doses will be injected into the pectoralis major, subscapularis and teres  
30  
31 222 major/latissimus dorsi muscles in a single site for each muscle on one occasion (visit 3:  
32  
33 223 12months +/- 15 days of age). These muscles have been the target of BTI treatment to prevent  
34  
35 224 the progression of humeral head subluxation and to improve active and passive shoulder ROM  
36  
37 225 in previous studies of children with BPBI[22]. Following reconstitution, the toxin will be  
38  
39 226 injected intramuscularly using a transcutaneous approach with a 27 gauge, 25mm long sterile  
40  
41 227 needle. Ultrasound guidance will be used to identify the muscles. A detailed protocol has been  
42  
43 228 written to ensure standardization of the procedure (supplementary material 1). The chosen doses  
44  
45 229 are based on data in the literature in children and babies with BPBI[20,22,23]: a total of 8U/kg  
46  
47 230 will be injected (2U/kg in subscapularis, 3U/kg in pectoralis major and 3U/kg in teres  
48  
49 231 major/latissimus dorsi). Because there is no marketing authorisation for the use of botulinum  
50  
51 232 toxin in children under the age of two years, the chosen doses are smaller than the maximal  
52  
53 233 doses authorized for the treatment of spasticity in older children with cerebral palsy. Moreover,  
54  
55 234 the doses chosen correspond with doses used in previous studies. A standardized protocol for  
56  
57 235 the prevention and treatment of induced pain and post-injection pain will be systematically  
58  
59 236 used. This will involve the administration of topical anaesthesia (such as EMLA) and  
60  
237 paracetamol (dose according to the baby's weight) one hour prior to the injection. Distraction  
238 techniques will be used during the injection. The parents will be instructed to bring reassuring,  
239 familiar objects belonging to the baby (e.g. soft toy, pacifier, nursery rhyme, music). In order

1  
2  
3 240 to standardize practices and to ensure maximum safety and efficacy, staff from the different  
4  
5 241 centres will all be trained in BTI of the shoulder muscles using ultrasound guidance in babies  
6  
7 242 prior to participating in the study. Only physicians with at least five years of experience in BTI  
8  
9 243 will be authorized to perform the injections.

10 244

#### 11 245 Sham procedure

12 246 The aim of the Sham procedure is to mimic the BTI and to maintain the blinding of the  
13  
14 247 research team and the parents or guardians. The same anesthetic procedure will be carried out  
15  
16 248 as for BTI. The physician performing the injection will prepare a syringe containing  
17  
18 249 physiological saline solution 10 minutes prior to the Sham procedure. The procedure will be  
19  
20 250 simulated with ultrasound and use of a blunt needle (that will not penetrate the skin) on the sites  
21  
22 251 selected for injection. All sites will be covered with adhesive dressings and tincture of betadine,  
23  
24 252 as for the BTI. With regard to the control treatment, a sham procedure mimicking BTI without  
25  
26 253 injection is ethically more appropriate than an invasive placebo procedure because of the young  
27  
28 254 age of the children involved.

29 255

#### 30 256 Rehabilitation and medical follow up

31 257 To ensure comparability, the babies in both groups will receive 2 sessions of physiotherapy per  
32  
33 258 week. Physiotherapy will be standardized and based on evidence from studies of early  
34  
35 259 physiotherapy management [29,30]. It will involve: (I) maintaining passive range of motion of  
36  
37 260 all the upper limb joints, in particular shoulder external rotation, elbow extension and forearm  
38  
39 261 pronation; (II) active-assisted and active movements of the involved shoulder; (III) bimanual  
40  
41 262 functional training; (IV) training to integrate the involved upper limb in functional activities  
42  
43 263 and (V) parent education: child positioning, stimulation of active movement and function at  
44  
45 264 home. A standardized medical prescription will be given. An information and advice letter will  
46  
47 265 be given to the physiotherapists via the parents to standardize and optimise physiotherapy  
48  
49 266 treatment. Advice will be given to parents regarding exercises to carry out at home, they will  
50  
51 267 be taught to encourage use of the upper limb at home. All other medical treatment and  
52  
53 268 rehabilitation will be carried out according to usual procedures.

54 269

#### 55 270 Adverse events

56 271 Adverse events relating to the use of botulinum toxin

57 272 The secondary effects of BTI are mostly mild, temporary and related to the dose and the  
58  
59 273 injection site. Local reactions such as contusions or pain at the injection site may occur, or

1  
2  
3 274 excessive, localised muscle weakness. Systemic effects are rare and include generalised allergic  
4  
5 275 reactions and effects related to product diffusion (rash, erythema, pruritus, anaphylactic  
6  
7 276 reaction, flu-like syndrome, headaches, dizziness, fever, shivering, hypertension, and  
8  
9 277 abdominal pain and dry mouth). Exceptionally, serious effects have been observed, a type of  
10  
11 278 excessive muscle weakness, dysphagia and aspiration pneumonia, however these occurred  
12  
13 279 principally when the recommended doses were not respected[25,31–33]. The safety of BTI in  
14  
15 280 infants under two years of age was shown to be good in a recent systematic review[25] and the  
16  
17 281 tolerance of this treatment also seems good in this population[22,33,34]. The specific effects  
18  
19 282 on muscle structure and the contractile properties of muscles are, however, poorly understood.  
20  
21 283 Moderate muscle atrophy and fatty infiltration may occur following injections[26,35,36].

22 284 According to the usual procedure used for the injection of botulinum toxin in each  
23  
24 285 hospital, an information sheet will be provided to each patient explaining the action to be taken  
25  
26 286 in the case of an adverse effect. According to this procedure, parents will be instructed to  
27  
28 287 urgently consult their general practitioner or the pediatric emergency department in the case of  
29  
30 288 the occurrence of a serious adverse effect such as generalized weakness or cardio-respiratory  
31  
32 289 insufficiency. There is no antidote to botulinum toxin therefore symptomatic treatment will be  
33  
34 290 administered, if required.

35 291 In the case of a serious adverse event, unblinding will be carried out. If an investigator  
36  
37 292 wishes to treat the child with aminoglycosides, which are contraindicated in the case of  
38  
39 293 treatment by botulinum toxin, unblinding will be carried out.

40 294 Parents will be questioned regarding adverse events at 10 days and then monthly  
41  
42 295 between 12 and 18 months of age using standardized questionnaires that include all possible  
43  
44 296 side effects.

#### 45 297 46 298 Adverse events related to MRI premedication

47 299 The risks related to the premedication are the standard risks for the sedation or  
48  
49 300 anaesthesia of children (gastritis, anticholinergic effects, oxygen desaturation, excessive  
50  
51 301 sedation). The child will be examined for potential risks during a routine paediatric or  
52  
53 302 anaesthetic consultation.

#### 54 303 55 304 Independent Data Monitoring Committee and un-blinding procedure

56 305 An independent data safety monitoring Committee (DSMC) comprised of five  
57  
58 306 independent members will be set up. The purpose of the DSMC will be to provide an  
59  
60

1  
2  
3 307 independent evaluation of any adverse events that occur during the research, as well as to  
4  
5 308 monitor the benefit / risk ratio.

6 309 Should an adverse event that requires different care than that planned in the study occur,  
7  
8 310 unblinding will be carried out. Unblinding will not be carried out in any other condition.

9  
10 311

### 11 312 **Patient and Public involvement statement**

12 313 Patients were not involved in the development of the research, and will not be involved  
13  
14 314 in the recruitment and conduct of the study. Results of the study will be given to the parents  
15  
16 315 after the study during a medical consultation in their participating center.

17  
18 316

### 19 317 **OUTCOME MEASURES**

20  
21 318

#### 22 319 **Primary Outcome (table 1)**

23  
24 320 The primary outcome measure is the change in the percentage of posterior migration of  
25  
26 321 the humeral head measured on an axial MRI image between 11 months (before the BTI at 12  
27  
28 322 months) and 18 months of age (6 months post BTI) at visits 2 and 10. Posterior subluxation will  
29  
30 323 be evaluated using the method described by Waters, on an axial MRI slice taken just below the  
31  
32 324 coracoid process [37–39]. Percentage posterior subluxation will be calculated in the following  
33  
34 325 manner: a line will be traced from the medial border of the scapula to the middle of the glenoid  
35  
36 326 fossa. A segment will then be drawn perpendicularly to the line, from the widest part of the  
37  
38 327 humeral head (AC). The length of the anterior part of this segment (AB) divided by the (AC)  
39  
40 328 segment will be multiplied by 100 to obtain the percentage migration of the humeral head. A  
41  
42 329 percentage below 50% indicates posterior migration of the humeral head. This measurement is  
43  
44 330 quick to carry out and is used in both research and routine clinical practice in children and  
45  
46 331 babies with BPBI to help preoperative decision making for the type of intervention and post-  
47  
48 332 operative follow up[6,8,39]. Intra- and inter-rater reliability have been shown to be excellent,  
49  
50 333 with a 7% estimated measurement error [38]. MRI data will be analysed centrally (at Brest  
51  
52 334 CHRU) by two trained investigators using the same guidelines in order to minimise inter-rater  
53  
54 335 variability and to ensure the blinding of the evaluator.

55  
56 336

#### 57 337 **Secondary Outcome Measures (table 1)**

58 338 Glenoid retroversion and three-dimensional deformity

1  
2  
3 339 The following MRI measurements will be compared at visits 2 and 10 (11 and 18 months  
4 of age) to determine the effectiveness of BTI relative to the sham treatment in limiting the  
5 340 progression of glenoid retroversion and three-dimensional deformity:  
6 341

- 7  
8 342 1) 2D glenoid version will be measured on an axial image using Friedman's  
9 technique[40]. This measurement has been validated and is used in clinical practice  
10 343 and research[10,38].  
11 344  
12 345 2) 3D glenoid version and 3D migration of the humeral will be measured on MRIs  
13 following 3D reconstruction. These original measurements were recently used for  
14 346 the first time[41] and will provide an evaluation of 3D shoulder deformity and the  
15 347 effect of BTI on the deformity.  
16 348  
17 349

#### 22 350 Passive and active movement and upper limb function

23  
24 351 Three standardized evaluations will be carried out by occupational therapists or  
25 352 physiotherapists to compare the effect of BTI and the sham treatment on active and passive  
26 joint range of motion and upper limb function. All therapists will undergo training prior to their  
27 353 involvement in the study in order to ensure the reliability of measures.  
28 354

- 29 355 1) Passive shoulder ROM will be measured at the baseline (before the MRI at visit 1,  
30 between 10 and 11 months of age), at visits 7 and 10 (15-months and 18-months of  
31 356 age visits).  
32 357  
33 358 2) The AMS (Active Movement Scale) will be rated at baseline (before the MRI at visit  
34 1, between 10 and 11 months of age), and at visits 7 and 10 (15-months and 18-  
35 359 months of age visits). This test evaluates upper limb strength in babies with BPBI  
36 360 during active movements. Each movement is rated on an 8-point scale from 0 (no  
37 361 movement) to 7 (complete movement against gravity). It has satisfactory  
38 362 psychometric properties[42,43] in trained therapists.  
39 363  
40 364 3) The Mini-AHA (Mini-assistive Hand Assessment) will be rated at visit 1 and 10  
41 365 (baseline and the 18-months of age visits). This functional evaluation measures  
42 366 bimanual performance during games and tasks. It was designed for children aged  
43 367 from 8 to 18 months[44].  
44 368  
45 369

#### 54 369 Tolerance

55 370 The parents of the babies in both groups will be questioned at 10 days and each month  
56 371 between 12 and 18 months of age using a standardized questionnaire that includes a list of all  
57 372 possible side effects of BTI.



1  
2  
3 373  
4  
5 374 Changes in muscle structure (BTI group only)  
6  
7 375 3D MRI reconstruction[27] and the validated technique described by Hogendoorn et  
8  
9 376 al.[45] will be used to respectively evaluate the direct effects of BTI injections on muscle  
10  
11 377 volume and fatty infiltration of the shoulder muscles. This evaluation will only be carried out  
12  
13 378 in the BTI group.

13 379

15 380 Future surgical interventions

17 381 To determine if BTI reduces the frequency and complexity of surgical interventions in  
18  
19 382 the long term, surgical procedures undergone by the children in both groups (recorded during  
20  
21 383 routine medical follow-up) will be compared up to the age of 10 years.

22 384

### 24 385 **Locations and data management**

25 386 Each centre will manage their own recruitment of babies and organization of MRIs,  
26  
27 387 clinical evaluations and treatment. Electronic data will be secured and analyzed in a central  
28  
29 388 database managed by the Brest CHRU. Data will be the property of CHRU Brest.

30 389 In accordance with Good Clinical Practice (GCP) guidelines, the sponsor is in charge of  
31  
32 390 obtaining agreement from all centers involved in the clinical research, in order to guarantee  
33  
34 391 direct access to all the clinical research sites, to all the source data, source documents and all  
35  
36 392 the reports for the purpose of Quality Control and audit by the sponsor.

37 393 All information required for the study will be entered in the paper case report forms  
38  
39 394 during evaluations, then transferred to the electronic case report form (Clinsigth). Items of  
40  
41 395 missing data will be coded. Each centre will be responsible for completing the CRFs for the  
42  
43 396 babies enrolled in their centre. Each investigator will receive an instruction document regarding  
44  
45 397 the use of this tool. The investigator will be responsible for the accuracy, quality and relevance  
46  
47 398 of all the data entered. In addition, the data will be immediately verified as they are entered,  
48  
49 399 using consistency checks. The investigator must validate any changes to the values in the CRF.  
50  
51 400 These modifications will be subject to an audit trail. A justification can be added when  
52  
53 401 applicable, as a comment. Data management and query processing will be carried out by a data  
54  
55 402 manager.

55 403

56 404 A Clinical Research Assistant (CRA) appointed by the sponsor will ensure the good  
57  
58 405 running of the study, data collection on the paper CRF, data recording in the electronic CRF,  
59  
60



1  
2  
3 406 data saving and reporting in accordance with the sponsor's Standardized Operating Procedures  
4  
5 407 as well as the GCP guidelines and current legislation and laws in force.

6 408 The investigator and the members of his/her team will agree to be available during all the  
7  
8 409 routine and planned Quality Control visits by the CRA. During these visits, the following will  
9  
10 410 be audited: signed informed consent, compliance with the study protocol and procedures, data  
11  
12 411 recorded in the CRF: accuracy, missing data, consistency between these data and their "source"  
13  
14 412 (medical files, original laboratory results, etc.), product management and investigator file. The  
15  
16 413 investigators agree to accept the quality assurance audits carried out by the sponsor as well as  
17  
18 414 the inspections carried out by the competent authorities. All data, documents and reports may  
19  
20 415 be subject to regulatory audits and inspections. Medical confidentiality cannot be invoked in  
21  
22 416 opposition to these audits and inspections.

23 417 Any data sent to the sponsor by the investigators (or any other specialised parties) during or  
24  
25 418 after the biomedical research will be anonymised. These data should not reveal any visibly  
26  
27 419 accurate names and addresses of enrolled (involved) individuals. Only the first letter of the  
28  
29 420 subject's name and first name will be saved along with a coded number indicating the order of  
30  
31 421 inclusion of the subjects. The sponsor will ensure that the parent of each research subject has  
32  
33 422 given permission in writing for access to personal information about the baby which is strictly  
34  
35 423 necessary for the quality control of the research.

36 424

### 425 **Sample size and statistical analysis**

37 426 No longitudinal data regarding the progression of bony deformities in children with  
38  
39 427 BPBI are available in the literature. Only transversal studies have been carried out, indicating  
40  
41 428 that posterior subluxation is significantly greater on the affected side compared with the healthy  
42  
43 429 side at the age of 4.8 months (affected side: 32.1% - SD=19.7% vs. healthy side: 49.8% -  
44  
45 430 SD=7.3%)[6]. The calculation of the number of subjects necessary for this study was based on  
46  
47 431 a difference of one standard deviation at 12 months, for a standard deviation of 5%.

48 432 In order to guarantee a power of 90%, a sample of 22 babies per group is required, thus a total  
49  
50 433 of 44. In order to account for babies lost to follow-up (10%) and babies who will not be treated  
51  
52 434 because of a lack of true subluxation on MRI, 62 babies will be recruited.

53 435 The characteristics of the babies in both groups will be described using means, standard  
54  
55 436 deviations, medians, quartiles or frequencies. Mean changes in 2D percentage humeral  
56  
57 437 subluxation, 3D humeral subluxation, 2D and 3D glenoid version, the AMS score and passive  
58  
59 438 shoulder ROM will be compared using analysis of covariance (ANCOVA) adjusted on the  
60  
439 initial values. If the hypotheses underlying the analysis of covariance model are not respected,

1  
2  
3 440 a non-parametric Wilcoxon test will be used. Shoulder muscle volumes and the mini-AHA  
4  
5 441 scores will be compared between the groups using a Student test or a non-parametric Mann-  
6  
7 442 Whitney test, depending on the distribution of the variable of interest. Lastly, the number of  
8  
9 443 serious and non-serious adverse events, and the degree of fibrosis and fatty infiltration will be  
10  
11 444 compared between the two groups using a Chi2 test or Fisher's exact test, so as the number of  
12  
13 445 secondary surgeries.  $p < 0.05$  will be considered as statistically significant.

14 446 Data analysis will be carried out on an intention to treat basis by a biostatistician after  
15  
16 447 blind review and database freezing at the end of the study. No intermediate analysis is planned  
17  
18 448 during this trial.

19 449

## 20 450 **DISCUSSION**

21  
22 451 This paper presents the background and design for a multicentre double-blind  
23  
24 452 randomised controlled trial to evaluate the effectiveness of BTI in the shoulder internal rotator  
25  
26 453 muscles of 12 months old babies in limiting the progression of posterior subluxation of the  
27  
28 454 glenohumeral joint, compared with a sham procedure. To our knowledge, this is the first study  
29  
30 455 with a sufficiently robust methodology to allow conclusions to be based on a high level of  
31  
32 456 evidence. The study has been approved by national French agencies: the Ministry of Research,  
33  
34 457 the National Ethical Committee and the National Drug Administration.

35 458 The babies included in the study will all receive 2 sessions of physiotherapy per week.  
36  
37 459 This choice was made because it is usual practice for babies with BPBI in France. In addition,  
38  
39 460 studies in other pathologies have shown that physiotherapy potentiates the effectiveness of BTI  
40  
41 461 [46]. Casting will not be used because it is invasive, has a low level of evidence and comports  
42  
43 462 a risk of interference with motor development in children who already have central nervous  
44  
45 463 system abnormalities [47].

46 464 The primary end-point, change in the percentage posterior migration of the humeral  
47  
48 465 head measured on an axial MRI image between 11 months (before BTI) and 18 months of age  
49  
50 466 (6 months post BTI), was chosen for its clinical relevance and its strong psychometric properties  
51  
52 467 compared with clinical or functional assessments in this population. Because the aim of this  
53  
54 468 study is to evaluate both bone deformity and muscle morphology in order to document the  
55  
56 469 consequences of BTI in non-spastic muscles and on shoulder muscle balance, we preferred  
57  
58 470 MRI over ultrasound since MRI can accurately measure both elements while ultrasound cannot.

59 471 Clinical evaluations carried out before and after BTI will determine the effects of the  
60  
472 treatment on shoulder ROM and functional capacity. Evaluations will be carried out monthly,  
473  
with alternate phone contacts and direct consultations in order to limit traveling, promote

1  
2  
3 474 adherence and limit losses to follow-up. Because there is currently no marketing authorisation  
4  
5 475 for BTI in infants under the age of two years, special attention was paid to the safety assessment.  
6  
7 476 The use of a systematic and detailed questionnaire will yield detailed and specific data,  
8  
9 477 confirming or not the safety of BTI before the age of two years.

10 478         Glenohumeral dysplasia can occur as early as 3 months of age. If this trial has positive  
11  
12 479 results and if the safety of BTI performed at 12 months of age in children with BPBI is proven,  
13  
14 480 studies evaluating the effect of BTI in the limitation of gleno-humeral deformity in younger  
15  
16 481 babies could be warranted.

17 482         The results of the study could lead to a request for an evaluation by the French National  
18  
19 483 Agency for Medicines and Health Products Safety (ANSM) for Temporary Recommendation  
20  
21 484 for Use (TRUs) of botulinum toxin in children with BPBI. It is expected that the results of this  
22  
23 485 trial will be published in peer-reviewed scholarly journals and international academic  
24  
25 486 conferences. If positive results

26 487         Conclusion

27 488         The POPBTOX trial is a nationwide, multicentre, randomised, controlled study that will  
28  
29 489 evaluate the effectiveness of BTI in the internal shoulder rotator muscles of 12 month-old babies  
30  
31 490 with BPBI in limiting shoulder deformity. Tolerance of the treatment will also be determined.  
32  
33 491 Existing results from uncontrolled studies suggest this treatment may be effective, however the  
34  
35 492 present study will allow robust conclusions to be drawn, potentially leading to a change in the  
36  
37 493 care of these children.  
38  
39  
40  
41  
42  
43  
44  
45  
46  
47  
48  
49  
50  
51  
52  
53  
54  
55  
56  
57  
58  
59  
60

**Table 1 : Visits and study procedure**

| <b>Action</b>                                               | <b>Visit 1 : 10 months of age (Inclusion, medical and therapists)</b> | <b>Visit 2: 11 months of age (MRI)</b> | <b>Visit 3: 12 months of age (injection, medical follow-up)</b> | <b>Visit 4: D10 post-injection (medical follow-up)</b> | <b>Visit 5: 13 months of age (Phone call)</b> | <b>Visit 6: 14 months of age (Phone call)</b> | <b>Visit 7 : 15 months of age (medical and therapists)</b> | <b>Visit 8 : 16 months of age (Phone call)</b> | <b>Visit 9 : 17 months of age (Phone call)</b> | <b>Visit 10: 18 months of age (MRI, therapists medical)</b> |
|-------------------------------------------------------------|-----------------------------------------------------------------------|----------------------------------------|-----------------------------------------------------------------|--------------------------------------------------------|-----------------------------------------------|-----------------------------------------------|------------------------------------------------------------|------------------------------------------------|------------------------------------------------|-------------------------------------------------------------|
| <i>Informed consent</i>                                     | X                                                                     |                                        |                                                                 |                                                        |                                               |                                               |                                                            |                                                |                                                |                                                             |
| <i>Incl./excl. criteria</i>                                 | X                                                                     |                                        |                                                                 |                                                        |                                               |                                               |                                                            |                                                |                                                |                                                             |
| <i>Medical history</i>                                      | X                                                                     |                                        |                                                                 |                                                        |                                               |                                               |                                                            |                                                |                                                |                                                             |
| <i>Notification of existing and planned BPBI care</i>       | X* →                                                                  |                                        |                                                                 |                                                        |                                               |                                               |                                                            |                                                |                                                |                                                             |
| <i>Active and passive shoulder range of motion (ROM)</i>    | X* →                                                                  |                                        |                                                                 |                                                        |                                               |                                               | X                                                          |                                                |                                                | X                                                           |
| <i>Active Movement Scale (AMS)</i>                          | X* →                                                                  |                                        |                                                                 |                                                        |                                               |                                               | X                                                          |                                                |                                                | X                                                           |
| <i>MRI of both shoulders</i>                                |                                                                       | X                                      |                                                                 |                                                        |                                               |                                               |                                                            |                                                |                                                | X                                                           |
| <i>mini-AHA Scale</i>                                       | X* →                                                                  |                                        |                                                                 |                                                        |                                               |                                               |                                                            |                                                |                                                | X                                                           |
| <i>Ramdomisati on criterion</i>                             |                                                                       | X                                      |                                                                 |                                                        |                                               |                                               |                                                            |                                                |                                                |                                                             |
| <i>Randomisatio n</i>                                       |                                                                       |                                        | X                                                               |                                                        |                                               |                                               |                                                            |                                                |                                                |                                                             |
| <i>BTI Injections or Sham procedure</i>                     |                                                                       |                                        | X                                                               |                                                        |                                               |                                               |                                                            |                                                |                                                |                                                             |
| <i>Notification of care (surgery or other)</i>              |                                                                       |                                        | X                                                               |                                                        |                                               |                                               |                                                            |                                                |                                                |                                                             |
| <i>Establishment of standardized physiotherapy follw-up</i> |                                                                       |                                        | X                                                               |                                                        |                                               |                                               |                                                            |                                                |                                                |                                                             |
| <i>Follow-up of physiotherapy</i>                           |                                                                       |                                        |                                                                 | X                                                      | X                                             | X                                             | X                                                          | X                                              | X                                              | X                                                           |

|                       |  |   |   |   |   |   |   |   |   |   |
|-----------------------|--|---|---|---|---|---|---|---|---|---|
| <i>Adverse Events</i> |  | X | X | X | X | X | X | X | X | X |
| <i>Unblinding</i>     |  |   |   |   |   |   |   |   |   | X |

X\* → : Will be carried out before MRI

Figure 1 : Flow chart

### Supplementary material 1: Botulinum toxin injections procedure

The Botox will be injected intramuscularly by transcutaneous approach using a 27 gauge, 25mm long sterile needle. This information can be added in the main text.

In the study protocol, we specifically described the procedure to ensure standardization (provided below). We propose to add this as supplementary material in the article.

“One hour before the injections, preliminary ultrasound identification will be carried out so that anaesthetic cream can be applied to the skin over the future injection sites.

For all injections, the child will be held in the arms of one of his/her parents.

Teres Major:

The parent will recline on the examination table, with the baby in his/her arms facing him/her (“belly to belly”). The sleep mask will be positioned on the parent at this time to ensure the blinding. The paediatric auxiliary can help to hold the child if necessary. The teres major muscle will be located by ultrasound, and the skin disinfected. Injection and/or simulation of the injection of the muscle (sham procedure) will be performed using a 27 gauge, 25mm long sterile needle. The ultrasound probe may be held by the nurse during the injection. After the injection, the skin will be cleansed with saline, and systematically covered with a dressing.

Subscapularis:

The baby will remain in the arms of the parent, “belly to belly”. The arm on the injected side will be placed in maximum abduction by the paediatric auxiliary. The subscapularis muscle will be identified by ultrasound. The skin will be disinfected. Injection and/or simulation of the injection of the muscle will be performed (sham procedure) using a 27 gauge, 25mm long sterile needle. The ultrasound probe may be held by the nurse during the injection. After the injection, the skin will be cleansed with saline, and systematically covered with a dressing.

Pectoralis Major:

The face mask will be removed so that the parent can change position and the position of the baby can be changed. The parent will sit in a chair with the child on his/her lap in a sitting position. The face mask will be repositioned. The pectoralis major muscle will be identified by ultrasound. The skin will be disinfected. Injection and/or simulation of the injection of the muscle (sham procedure) will be performed using a 27 gauge, 25mm long sterile needle. The ultrasound probe may be held by the nurse during the injection. After the injection, the skin will be cleansed with saline, and systematically covered with a dressing.

**Acknowledgements**

The authors acknowledge Chloe Bureau, Bhushan Borotikar, Céline Dolou, Valentine Guiton, Mélanie Pelouin, Emmanuel Novak for their help in building this project and Johanna Robertson for her help in revising English.

**Author contribution**

CP and SB conceived the study and defined the original study protocol. NQP, FF, CP and SB developed the intervention parameters. MG and DBS defined the radiological parameters and developed radiological protocols. ED is responsible for the ethics applications and the ethical reporting of the study. FF, NQP, CP, LH, are responsible for recruitment, data collection and implementation of the study. GG is responsible for the study methodology. POPBtox group involves physicians who are only implicated for recruitment and data collection.

All authors have read and approved the final manuscript. CP, ED and SB drafted the final version of this manuscript

**Funding**

This work was supported by a French national PHRC 15 -282

**Disclaimer**

The funding body is not involved in the study design, data collection, management, analysis, and interpretation of data. The authors have the ultimate authority over these activities.

**Competing interests** Dr Pons reports non-financial support from Biogen, outside the submitted work. Dr. Brochard reports non-financial support from Allergan, outside the submitted work. Dr. Le Gal reports other from Portola Pharmaceuticals, other from Boehringer-Ingelheim, other from Pfizer, other from Bristol-Myers Squibb, other from LEO Pharma, other from Daiichi Sankyo, other from Bayer, other from Bayer, other from Pfizer, other from LEO Pharma, other from Sanofi, other from bioMérieux, outside the submitted work.

**Sponsor**

Brest CHRU, 2 avenue Foch, 29200 Brest, France

**Ethics approval**

The Ouest 1 Research Ethics Committee (n° 2015-R22) and ANSM (151357A-31) approved the protocol.

**Data sharing statement**

In accordance with the protocol, the study data will be published.



## REFERENCES

- 1 Chauhan SP, Blackwell SB, Ananth CV. Neonatal brachial plexus palsy: incidence, prevalence, and temporal trends. *Semin Perinatol* 2014;**38**:210–8. doi:10.1053/j.semperi.2014.04.007
- 2 Hoeksma AF, ter Steeg AM, Nelissen RGHH, *et al.* Neurological recovery in obstetric brachial plexus injuries: an historical cohort study. *Dev Med Child Neurol* 2004;**46**:76–83.
- 3 Julka A, Vander Have KL. Shoulder sequelae of neonatal brachial plexus injuries: orthopedic assessment and management. *J Pediatr Rehabil Med* 2011;**4**:131–40. doi:10.3233/PRM-2011-0165
- 4 Zafeiriou DI, Psychogiou K. Obstetrical brachial plexus palsy. *Pediatr Neurol* 2008;**38**:235–42. doi:10.1016/j.pediatrneurol.2007.09.013
- 5 Pearl ML. Shoulder problems in children with brachial plexus birth palsy: evaluation and management. *J Am Acad Orthop Surg* 2009;**17**:242–54.
- 6 Van Gelein Vtringa VM, Jaspers R, Mullender M, *et al.* Early effects of muscle atrophy on shoulder joint development in infants with unilateral birth brachial plexus injury. *Dev Med Child Neurol* 2011;**53**:173–8. doi:10.1111/j.1469-8749.2010.03783.x
- 7 van der Sluijs JA, van Ouwerkerk WJ, de Gast A, *et al.* Deformities of the shoulder in infants younger than 12 months with an obstetric lesion of the brachial plexus. *J Bone Joint Surg Br* 2001;**83**:551–5.
- 8 van der Sluijs JA, van Ouwerkerk WJR, Manoliu RA, *et al.* Secondary deformities of the shoulder in infants with an obstetrical brachial plexus lesions considered for neurosurgical treatment. *Neurosurg Focus* 2004;**16**:E9.
- 9 Waters PM. Update on management of pediatric brachial plexus palsy. *J Pediatr Orthop B* 2005;**14**:233–44.
- 10 Pöyhiä TH, Nietosvaara YA, Remes VM, *et al.* MRI of rotator cuff muscle atrophy in relation to glenohumeral joint incongruence in brachial plexus birth injury. *Pediatr Radiol* 2005;**35**:402–9. doi:10.1007/s00247-004-1377-3
- 11 Crouch DL, Plate JF, Li Z, *et al.* Computational sensitivity analysis to identify muscles that can mechanically contribute to shoulder deformity following brachial plexus birth palsy. *J Hand Surg Am* 2014;**39**:303–11. doi:10.1016/j.jhsa.2013.10.027
- 12 Kleiber T, Popovic N, Bahm J, *et al.* A modeling approach to compute modification of net joint forces caused by coping movements in obstetric brachial plexus palsy. *J Brachial Plex Peripher Nerve Inj* 2013;**8**:10. doi:10.1186/1749-7221-8-10
- 13 Moukoko D, Ezaki M, Wilkes D, *et al.* Posterior shoulder dislocation in infants with neonatal brachial plexus palsy. *J Bone Joint Surg Am* 2004;**86-A**:787–93.
- 14 Partridge C, Edwards S. Obstetric brachial plexus palsy: increasing disability and exacerbation of symptoms with age. *Physiother Res Int* 2004;**9**:157–63.
- 15 Kirkos JM, Kyrkos MJ, Kapetanios GA, *et al.* Brachial plexus palsy secondary to birth injuries. *J Bone Joint Surg Br* 2005;**87**:231–5.
- 16 Hulleberg G, Elvrum A-KG, Brandal M, *et al.* Outcome in adolescence of brachial plexus birth palsy. 69 individuals re-examined after 10–20 years. *Acta Orthop* 2014;**85**:633–40. doi:10.3109/17453674.2014.964614
- 17 Squitieri L, Larson BP, Chang KWC, *et al.* Understanding quality of life and patient expectations among adolescents with neonatal brachial plexus palsy: a qualitative and quantitative pilot study. *J Hand Surg Am* 2013;**38**:2387–2397.e2.
- 18 Novak I, McIntyre S, Morgan C, *et al.* A systematic review of interventions for children with cerebral palsy: state of the evidence. *Dev Med Child Neurol* 2013;**55**:885–910.



doi:10.1111/dmcn.12246

19 Ruchelsman DE, Pettrone S, Price AE, *et al.* Brachial plexus birth palsy: an overview of early treatment considerations. *Bull NYU Hosp Jt Dis* 2009;**67**:83–9.

20 Gobets D, Beckerman H, de Groot V, *et al.* Indications and effects of botulinum toxin A for obstetric brachial plexus injury: a systematic literature review. *Dev Med Child Neurol* 2010;**52**:517–28. doi:10.1111/j.1469-8749.2009.03607.x

21 Brochard S, Alter K, Damiano D. Shoulder strength profiles in children with and without brachial PLEXUS PALSY. *Muscle Nerve* 2014;**50**:60–6. doi:10.1002/mus.24099

22 Ezaki M, Malungpaishrope K, Harrison RJ, *et al.* Onabotulinum toxinA injection as an adjunct in the treatment of posterior shoulder subluxation in neonatal brachial plexus palsy. *J Bone Joint Surg Am* 2010;**92**:2171–7. doi:10.2106/JBJS.I.00499

23 Michaud LJ, Louden EJ, Lippert WC, *et al.* Use of botulinum toxin type A in the management of neonatal brachial plexus palsy. *PM R* 2014;**6**:1107–19. doi:10.1016/j.pmrj.2014.05.002

24 Shin YB, Shin MJ, Chang JH, *et al.* Effects of Botulinum Toxin on Reducing the Co-contraction of Antagonists in Birth Brachial Plexus Palsy. *Ann Rehabil Med* 2014;**38**:127–31. doi:10.5535/arm.2014.38.1.127

25 Bourseul J-S, Molina A, Lintanf M, *et al.* Early Botulinum Toxin Injections in Infants With Musculoskeletal Disorders: A Systematic Review of Safety and Effectiveness. *Arch Phys Med Rehabil* Published Online First: 27 December 2017. doi:10.1016/j.apmr.2017.11.013

26 Williams SA, Reid S, Elliott C, *et al.* Muscle volume alterations in spastic muscles immediately following botulinum toxin type-A treatment in children with cerebral palsy. *Dev Med Child Neurol* 2013;**55**:813–20. doi:10.1111/dmcn.12200

27 Pons C, Sheehan FT, Im HS, *et al.* Shoulder muscle atrophy and its relation to strength loss in obstetrical brachial plexus palsy. *Clin Biomech (Bristol, Avon)* 2017;**48**:80–7. doi:10.1016/j.clinbiomech.2017.07.010

28 Kamath S, Venkatanarasimha N, Walsh MA, *et al.* MRI appearance of muscle denervation. *Skeletal Radiology* 2008;**37**:397–404. doi:10.1007/s00256-007-0409-0

29 Bialocerkowski A, Kurlowicz K, Vladusic S, *et al.* Effectiveness of primary conservative management for infants with obstetric brachial plexus palsy. *Int J Evid Based Healthc* 2005;**3**:27–44. doi:10.1111/j.1479-6988.2005.00020.x

30 Justice D, Rasmussen L, Di Pietro M, *et al.* Prevalence of Posterior Shoulder Subluxation in Children With Neonatal Brachial Plexus Palsy After Early Full Passive Range of Motion Exercises. *PM R* 2015;**7**:1235–42. doi:10.1016/j.pmrj.2015.05.013

31 Papavasiliou AS, Nikaina I, Foska K, *et al.* Safety of Botulinum Toxin A in Children and Adolescents with Cerebral Palsy in a Pragmatic Setting. *Toxins (Basel)* 2013;**5**:524–36. doi:10.3390/toxins5030524

32 Albavera-Hernández C, Rodríguez JM, Idrovo AJ. Safety of botulinum toxin type A among children with spasticity secondary to cerebral palsy: a systematic review of randomized clinical trials. *Clin Rehabil* 2009;**23**:394–407. doi:10.1177/0269215508099860

33 Dahan-Oliel N, Kasaai B, Montpetit K, *et al.* Effectiveness and safety of botulinum toxin type a in children with musculoskeletal conditions: what is the current state of evidence? *Int J Pediatr* 2012;**2012**:898924. doi:10.1155/2012/898924

34 Desiato MT, Risina B. The role of botulinum toxin in the neuro-rehabilitation of young patients with brachial plexus birth palsy. *Pediatr Rehabil* 2001;**4**:29–36.

35 Fortuna R, Vaz MA, Youssef AR, *et al.* Changes in contractile properties of muscles receiving repeat injections of botulinum toxin (Botox). *J Biomech* 2011;**44**:39–44. doi:10.1016/j.jbiomech.2010.08.020

36 Schroeder AS, Ertl-Wagner B, Britsch S, *et al.* Muscle biopsy substantiates long-term

- 1  
2  
3 MRI alterations one year after a single dose of botulinum toxin injected into the lateral  
4 gastrocnemius muscle of healthy volunteers. *Mov Disord* 2009;**24**:1494–503.  
5 doi:10.1002/mds.22661  
6  
7 37 H Kozin S. Correlation Between External Rotation of the Glenohumeral Joint and  
8 Deformity after Brachial Plexus Birth Palsy. *Journal of pediatric orthopedics* 2004;**24**:189–  
9 93. doi:10.1097/01241398-200403000-00011  
10 38 Lippert WC, Mehlman CT, Cornwall R, *et al.* The intrarater and interrater reliability  
11 of glenoid version and glenohumeral subluxation measurements in neonatal brachial plexus  
12 palsy. *J Pediatr Orthop* 2012;**32**:378–84. doi:10.1097/BPO.0b013e31825611bd  
13 39 Waters PM, Smith GR, Jaramillo D. Glenohumeral deformity secondary to brachial  
14 plexus birth palsy. *J Bone Joint Surg Am* 1998;**80**:668–77.  
15 40 Friedman RJ, Hawthorne KB, Genez BM. The use of computerized tomography in the  
16 measurement of glenoid version. *J Bone Joint Surg Am* 1992;**74**:1032–7.  
17 41 Brochard S, Mozingo JD, Alter KE, *et al.* Three dimensionality of gleno-humeral  
18 deformities in obstetrical brachial plexus palsy. *J Orthop Res* 2016;**34**:675–82.  
19 doi:10.1002/jor.23049  
20 42 Curtis C, Stephens D, Clarke HM, *et al.* The active movement scale: an evaluative tool  
21 for infants with obstetrical brachial plexus palsy. *J Hand Surg Am* 2002;**27**:470–8.  
22 43 Bialocerowski A, O'shea K, Pin TW. Psychometric properties of outcome measures  
23 for children and adolescents with brachial plexus birth palsy: a systematic review. *Dev Med*  
24 *Child Neurol* 2013;**55**:1075–88. doi:10.1111/dmcn.12194  
25 44 Greaves S, Imms C, Dodd K, *et al.* Development of the Mini-Assisting Hand  
26 Assessment: evidence for content and internal scale validity. *Dev Med Child Neurol*  
27 2013;**55**:1030–7. doi:10.1111/dmcn.12212  
28 45 Hogendoorn S, van Overvest KLJ, Watt I, *et al.* Structural changes in muscle and  
29 glenohumeral joint deformity in neonatal brachial plexus palsy. *J Bone Joint Surg Am*  
30 2010;**92**:935–42. doi:10.2106/JBJS.I.00193  
31 46 Fehlings D, Novak I, Berweck S, *et al.* Botulinum toxin assessment, intervention and  
32 follow-up for paediatric upper limb hypertonicity: international consensus statement. *Eur J*  
33 *Neurol* 2010;**17 Suppl 2**:38–56. doi:10.1111/j.1468-1331.2010.03127.x  
34 47 Anguelova GV, de Vlugt E, Vardy AN, *et al.* Cocontraction measured with short-  
35 range stiffness was higher in obstetric brachial plexus lesions patients compared to healthy  
36 subjects. *Journal of Biomechanics* 2017;**63**:192–6. doi:10.1016/j.jbiomech.2017.08.015  
37  
38  
39  
40  
41  
42  
43  
44  
45  
46  
47  
48  
49  
50  
51  
52  
53  
54  
55  
56  
57  
58  
59  
60

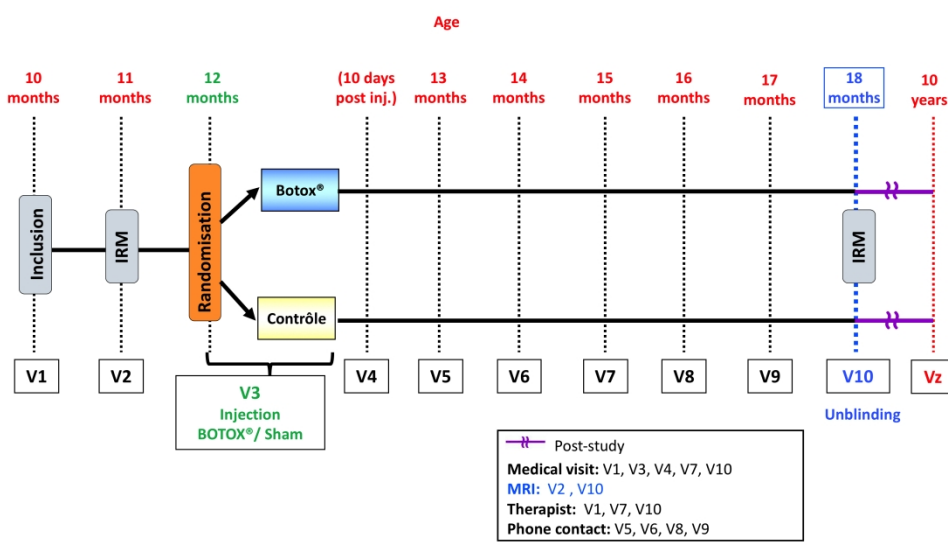

Figure 1 : Flow chart

1360x789mm (72 x 72 DPI)

### Supplementary file 1: Botulinum toxin injections procedure

The Botox will be injected intramuscularly by transcutaneous approach using a 27 gauge, 25mm long sterile needle. This information can be added in the main text.

In the study protocol, we specifically described the procedure to ensure standardization (provided below). We propose to add this as supplementary material in the article.

“One hour before the injections, preliminary ultrasound identification will be carried out so that anaesthetic cream can be applied to the skin over the future injection sites.

For all injections, the child will be held in the arms of one of his/her parents.

**Teres Major:**

The parent will recline on the examination table, with the baby in his/her arms facing him/her (“belly to belly”). The sleep mask will be positioned on the parent at this time to ensure the blinding. The paediatric auxiliary can help to hold the child if necessary. The teres major muscle will be located by ultrasound, and the skin disinfected. Injection and/or simulation of the injection of the muscle (sham procedure) will be performed using a 27 gauge, 25mm long sterile needle. The ultrasound probe may be held by the nurse during the injection. After the injection, the skin will be cleansed with saline, and systematically covered with a dressing.

**Subscapularis:**

The baby will remain in the arms of the parent, “belly to belly”. The arm on the injected side will be placed in maximum abduction by the paediatric auxiliary. The subscapularis muscle will be identified by ultrasound. The skin will be disinfected. Injection and/or simulation of the injection of the muscle will be performed (sham procedure) using a 27 gauge, 25mm long sterile needle. The ultrasound probe may be held by the nurse during the injection. After the injection, the skin will be cleansed with saline, and systematically covered with a dressing.

**Pectoralis Major:**

The face mask will be removed so that the parent can change position and the position of the baby can be changed. The parent will sit in a chair with the child on his/her lap in a sitting position. The face mask will be repositioned. The pectoralis major muscle will be identified by ultrasound. The skin will be disinfected. Injection and/or simulation of the injection of the muscle (sham procedure) will be performed using a 27 gauge, 25mm long sterile needle. The ultrasound probe may be held by the nurse during the injection. After the injection, the skin will be cleansed with saline, and systematically covered with a dressing.”

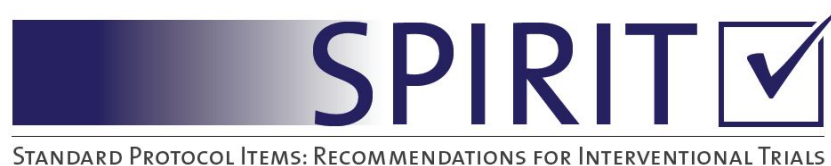

SPIRIT 2013 Checklist: Recommended items to address in a clinical trial protocol and related documents\*

| Section/item                      | Item No | Description                                                                                                                                                                                                                                                                              | Addressed on page number |
|-----------------------------------|---------|------------------------------------------------------------------------------------------------------------------------------------------------------------------------------------------------------------------------------------------------------------------------------------------|--------------------------|
| <b>Administrative information</b> |         |                                                                                                                                                                                                                                                                                          |                          |
| Title                             | 1       | Descriptive title identifying the study design, population, interventions, and, if applicable, trial acronym                                                                                                                                                                             | P1                       |
| Trial registration                | 2a      | Trial identifier and registry name. If not yet registered, name of intended registry                                                                                                                                                                                                     | P5                       |
|                                   | 2b      | All items from the World Health Organization Trial Registration Data Set                                                                                                                                                                                                                 | P5                       |
| Protocol version                  | 3       | Date and version identifier                                                                                                                                                                                                                                                              | P5                       |
| Funding                           | 4       | Sources and types of financial, material, and other support                                                                                                                                                                                                                              | P19                      |
| Roles and responsibilities        | 5a      | Names, affiliations, and roles of protocol contributors                                                                                                                                                                                                                                  | P1 and 19                |
|                                   | 5b      | Name and contact information for the trial sponsor                                                                                                                                                                                                                                       | P5 and 19                |
|                                   | 5c      | Role of study sponsor and funders, if any, in study design; collection, management, analysis, and interpretation of data; writing of the report; and the decision to submit the report for publication, including whether they will have ultimate authority over any of these activities | P19                      |
|                                   | 5d      | Composition, roles, and responsibilities of the coordinating centre, steering committee, endpoint adjudication committee, data management team, and other individuals or groups overseeing the trial, if applicable (see Item 21a for data monitoring committee)                         | P11 and 13-14            |

**Introduction**

|    |                                                           |     |                                                                                                                                                                                                                                                                                                                                                                                |                   |
|----|-----------------------------------------------------------|-----|--------------------------------------------------------------------------------------------------------------------------------------------------------------------------------------------------------------------------------------------------------------------------------------------------------------------------------------------------------------------------------|-------------------|
| 1  | Background and rationale                                  | 6a  | Description of research question and justification for undertaking the trial, including summary of relevant studies (published and unpublished) examining benefits and harms for each intervention                                                                                                                                                                             | P3-4              |
| 2  |                                                           |     |                                                                                                                                                                                                                                                                                                                                                                                |                   |
| 3  |                                                           |     |                                                                                                                                                                                                                                                                                                                                                                                |                   |
| 4  |                                                           | 6b  | Explanation for choice of comparators                                                                                                                                                                                                                                                                                                                                          | P4                |
| 5  |                                                           |     |                                                                                                                                                                                                                                                                                                                                                                                |                   |
| 6  | Objectives                                                | 7   | Specific objectives or hypotheses                                                                                                                                                                                                                                                                                                                                              | P4-5              |
| 7  |                                                           |     |                                                                                                                                                                                                                                                                                                                                                                                |                   |
| 8  | Trial design                                              | 8   | Description of trial design including type of trial (eg, parallel group, crossover, factorial, single group), allocation ratio, and framework (eg, superiority, equivalence, noninferiority, exploratory)                                                                                                                                                                      | P5                |
| 9  |                                                           |     |                                                                                                                                                                                                                                                                                                                                                                                |                   |
| 10 |                                                           |     |                                                                                                                                                                                                                                                                                                                                                                                |                   |
| 11 |                                                           |     |                                                                                                                                                                                                                                                                                                                                                                                |                   |
| 12 | <b>Methods: Participants, interventions, and outcomes</b> |     |                                                                                                                                                                                                                                                                                                                                                                                |                   |
| 13 |                                                           |     |                                                                                                                                                                                                                                                                                                                                                                                |                   |
| 14 | Study setting                                             | 9   | Description of study settings (eg, community clinic, academic hospital) and list of countries where data will be collected. Reference to where list of study sites can be obtained                                                                                                                                                                                             | P5                |
| 15 |                                                           |     |                                                                                                                                                                                                                                                                                                                                                                                |                   |
| 16 |                                                           |     |                                                                                                                                                                                                                                                                                                                                                                                |                   |
| 17 | Eligibility criteria                                      | 10  | Inclusion and exclusion criteria for participants. If applicable, eligibility criteria for study centres and individuals who will perform the interventions (eg, surgeons, psychotherapists)                                                                                                                                                                                   | P6                |
| 18 |                                                           |     |                                                                                                                                                                                                                                                                                                                                                                                |                   |
| 19 |                                                           |     |                                                                                                                                                                                                                                                                                                                                                                                |                   |
| 20 | Interventions                                             | 11a | Interventions for each group with sufficient detail to allow replication, including how and when they will be administered                                                                                                                                                                                                                                                     | P8-9              |
| 21 |                                                           |     |                                                                                                                                                                                                                                                                                                                                                                                |                   |
| 22 |                                                           |     |                                                                                                                                                                                                                                                                                                                                                                                |                   |
| 23 |                                                           | 11b | Criteria for discontinuing or modifying allocated interventions for a given trial participant (eg, drug dose change in response to harms, participant request, or improving/worsening disease)                                                                                                                                                                                 | NA_               |
| 24 |                                                           |     |                                                                                                                                                                                                                                                                                                                                                                                |                   |
| 25 |                                                           |     |                                                                                                                                                                                                                                                                                                                                                                                |                   |
| 26 |                                                           | 11c | Strategies to improve adherence to intervention protocols, and any procedures for monitoring adherence (eg, drug tablet return, laboratory tests)                                                                                                                                                                                                                              | P14               |
| 27 |                                                           |     |                                                                                                                                                                                                                                                                                                                                                                                |                   |
| 28 |                                                           |     |                                                                                                                                                                                                                                                                                                                                                                                |                   |
| 29 |                                                           | 11d | Relevant concomitant care and interventions that are permitted or prohibited during the trial                                                                                                                                                                                                                                                                                  | P9                |
| 30 |                                                           |     |                                                                                                                                                                                                                                                                                                                                                                                |                   |
| 31 | Outcomes                                                  | 12  | Primary, secondary, and other outcomes, including the specific measurement variable (eg, systolic blood pressure), analysis metric (eg, change from baseline, final value, time to event), method of aggregation (eg, median, proportion), and time point for each outcome. Explanation of the clinical relevance of chosen efficacy and harm outcomes is strongly recommended | P11-13            |
| 32 |                                                           |     |                                                                                                                                                                                                                                                                                                                                                                                |                   |
| 33 |                                                           |     |                                                                                                                                                                                                                                                                                                                                                                                |                   |
| 34 |                                                           |     |                                                                                                                                                                                                                                                                                                                                                                                |                   |
| 35 |                                                           |     |                                                                                                                                                                                                                                                                                                                                                                                |                   |
| 36 |                                                           |     |                                                                                                                                                                                                                                                                                                                                                                                |                   |
| 37 | Participant timeline                                      | 13  | Time schedule of enrolment, interventions (including any run-ins and washouts), assessments, and visits for participants. A schematic diagram is highly recommended (see Figure)                                                                                                                                                                                               | P6-7 fig1, table1 |
| 38 |                                                           |     |                                                                                                                                                                                                                                                                                                                                                                                |                   |
| 39 |                                                           |     |                                                                                                                                                                                                                                                                                                                                                                                |                   |
| 40 |                                                           |     |                                                                                                                                                                                                                                                                                                                                                                                |                   |
| 41 |                                                           |     |                                                                                                                                                                                                                                                                                                                                                                                |                   |
| 42 |                                                           |     |                                                                                                                                                                                                                                                                                                                                                                                |                   |
| 43 |                                                           |     |                                                                                                                                                                                                                                                                                                                                                                                |                   |
| 44 |                                                           |     |                                                                                                                                                                                                                                                                                                                                                                                |                   |
| 45 |                                                           |     |                                                                                                                                                                                                                                                                                                                                                                                |                   |
| 46 |                                                           |     |                                                                                                                                                                                                                                                                                                                                                                                |                   |

1 Sample size 14 Estimated number of participants needed to achieve study objectives and how it was determined, including P14-15  
 2 clinical and statistical assumptions supporting any sample size calculations  
 3

4 Recruitment 15 Strategies for achieving adequate participant enrolment to reach target sample size P5  
 5  
 6

7 **Methods: Assignment of interventions (for controlled trials)**

8 Allocation:  
 9

10 Sequence 16a Method of generating the allocation sequence (eg, computer-generated random numbers), and list of any P7-8  
 11 generation factors for stratification. To reduce predictability of a random sequence, details of any planned restriction  
 12 (eg, blocking) should be provided in a separate document that is unavailable to those who enrol participants  
 13 or assign interventions  
 14  
 15

16 Allocation 16b Mechanism of implementing the allocation sequence (eg, central telephone; sequentially numbered, P8  
 17 concealment opaque, sealed envelopes), describing any steps to conceal the sequence until interventions are assigned  
 18 mechanism  
 19

20 Implementation 16c Who will generate the allocation sequence, who will enrol participants, and who will assign participants to P8  
 21 interventions  
 22  
 23

24 Blinding (masking) 17a Who will be blinded after assignment to interventions (eg, trial participants, care providers, outcome P8  
 25 assessors, data analysts), and how  
 26

27 17b If blinded, circumstances under which unblinding is permissible, and procedure for revealing a participant's P10  
 28 allocated intervention during the trial  
 29  
 30

31 **Methods: Data collection, management, and analysis**

32  
 33 Data collection 18a Plans for assessment and collection of outcome, baseline, and other trial data, including any related P8, P11-13  
 34 methods processes to promote data quality (eg, duplicate measurements, training of assessors) and a description of  
 35 study instruments (eg, questionnaires, laboratory tests) along with their reliability and validity, if known.  
 36 Reference to where data collection forms can be found, if not in the protocol  
 37  
 38

39 18b Plans to promote participant retention and complete follow-up, including list of any outcome data to be P15  
 40 collected for participants who discontinue or deviate from intervention protocols  
 41  
 42



|    |                                 |     |                                                                                                                                                                                                                                                                                                                                       |              |
|----|---------------------------------|-----|---------------------------------------------------------------------------------------------------------------------------------------------------------------------------------------------------------------------------------------------------------------------------------------------------------------------------------------|--------------|
| 1  | Data management                 | 19  | Plans for data entry, coding, security, and storage, including any related processes to promote data quality (eg, double data entry; range checks for data values). Reference to where details of data management procedures can be found, if not in the protocol                                                                     | P13-14       |
| 2  |                                 |     |                                                                                                                                                                                                                                                                                                                                       |              |
| 3  |                                 |     |                                                                                                                                                                                                                                                                                                                                       |              |
| 4  |                                 |     |                                                                                                                                                                                                                                                                                                                                       |              |
| 5  | Statistical methods             | 20a | Statistical methods for analysing primary and secondary outcomes. Reference to where other details of the statistical analysis plan can be found, if not in the protocol                                                                                                                                                              | P14-15       |
| 6  |                                 |     |                                                                                                                                                                                                                                                                                                                                       |              |
| 7  |                                 |     |                                                                                                                                                                                                                                                                                                                                       |              |
| 8  |                                 | 20b | Methods for any additional analyses (eg, subgroup and adjusted analyses)                                                                                                                                                                                                                                                              | P14-15       |
| 9  |                                 |     |                                                                                                                                                                                                                                                                                                                                       |              |
| 10 |                                 | 20c | Definition of analysis population relating to protocol non-adherence (eg, as randomised analysis), and any statistical methods to handle missing data (eg, multiple imputation)                                                                                                                                                       | P15          |
| 11 |                                 |     |                                                                                                                                                                                                                                                                                                                                       |              |
| 12 |                                 |     |                                                                                                                                                                                                                                                                                                                                       |              |
| 13 |                                 |     |                                                                                                                                                                                                                                                                                                                                       |              |
| 14 | <b>Methods: Monitoring</b>      |     |                                                                                                                                                                                                                                                                                                                                       |              |
| 15 |                                 |     |                                                                                                                                                                                                                                                                                                                                       |              |
| 16 | Data monitoring                 | 21a | Composition of data monitoring committee (DMC); summary of its role and reporting structure; statement of whether it is independent from the sponsor and competing interests; and reference to where further details about its charter can be found, if not in the protocol. Alternatively, an explanation of why a DMC is not needed | P11          |
| 17 |                                 |     |                                                                                                                                                                                                                                                                                                                                       |              |
| 18 |                                 |     |                                                                                                                                                                                                                                                                                                                                       |              |
| 19 |                                 |     |                                                                                                                                                                                                                                                                                                                                       |              |
| 20 |                                 |     |                                                                                                                                                                                                                                                                                                                                       |              |
| 21 |                                 |     |                                                                                                                                                                                                                                                                                                                                       |              |
| 22 |                                 | 21b | Description of any interim analyses and stopping guidelines, including who will have access to these interim results and make the final decision to terminate the trial                                                                                                                                                               | NA           |
| 23 |                                 |     |                                                                                                                                                                                                                                                                                                                                       |              |
| 24 |                                 |     |                                                                                                                                                                                                                                                                                                                                       |              |
| 25 | Harms                           | 22  | Plans for collecting, assessing, reporting, and managing solicited and spontaneously reported adverse events and other unintended effects of trial interventions or trial conduct                                                                                                                                                     | P7, P10, P13 |
| 26 |                                 |     |                                                                                                                                                                                                                                                                                                                                       |              |
| 27 |                                 |     |                                                                                                                                                                                                                                                                                                                                       |              |
| 28 | Auditing                        | 23  | Frequency and procedures for auditing trial conduct, if any, and whether the process will be independent from investigators and the sponsor                                                                                                                                                                                           | P13-14       |
| 29 |                                 |     |                                                                                                                                                                                                                                                                                                                                       |              |
| 30 |                                 |     |                                                                                                                                                                                                                                                                                                                                       |              |
| 31 |                                 |     |                                                                                                                                                                                                                                                                                                                                       |              |
| 32 | <b>Ethics and dissemination</b> |     |                                                                                                                                                                                                                                                                                                                                       |              |
| 33 |                                 |     |                                                                                                                                                                                                                                                                                                                                       |              |
| 34 | Research ethics approval        | 24  | Plans for seeking research ethics committee/institutional review board (REC/IRB) approval                                                                                                                                                                                                                                             | P5           |
| 35 |                                 |     |                                                                                                                                                                                                                                                                                                                                       |              |
| 36 |                                 |     |                                                                                                                                                                                                                                                                                                                                       |              |
| 37 | Protocol amendments             | 25  | Plans for communicating important protocol modifications (eg, changes to eligibility criteria, outcomes, analyses) to relevant parties (eg, investigators, REC/IRBs, trial participants, trial registries, journals, regulators)                                                                                                      | P5           |
| 38 |                                 |     |                                                                                                                                                                                                                                                                                                                                       |              |
| 39 |                                 |     |                                                                                                                                                                                                                                                                                                                                       |              |
| 40 |                                 |     |                                                                                                                                                                                                                                                                                                                                       |              |
| 41 |                                 |     |                                                                                                                                                                                                                                                                                                                                       |              |
| 42 |                                 |     |                                                                                                                                                                                                                                                                                                                                       |              |
| 43 |                                 |     |                                                                                                                                                                                                                                                                                                                                       |              |
| 44 |                                 |     |                                                                                                                                                                                                                                                                                                                                       |              |
| 45 |                                 |     |                                                                                                                                                                                                                                                                                                                                       |              |
| 46 |                                 |     |                                                                                                                                                                                                                                                                                                                                       |              |

|    |                               |     |                                                                                                                                                                                                                                                                                     |               |
|----|-------------------------------|-----|-------------------------------------------------------------------------------------------------------------------------------------------------------------------------------------------------------------------------------------------------------------------------------------|---------------|
| 1  | Consent or assent             | 26a | Who will obtain informed consent or assent from potential trial participants or authorised surrogates, and how (see Item 32)                                                                                                                                                        | P6            |
| 2  |                               |     |                                                                                                                                                                                                                                                                                     |               |
| 3  |                               |     |                                                                                                                                                                                                                                                                                     |               |
| 4  |                               | 26b | Additional consent provisions for collection and use of participant data and biological specimens in ancillary studies, if applicable                                                                                                                                               | NA            |
| 5  |                               |     |                                                                                                                                                                                                                                                                                     |               |
| 6  |                               |     |                                                                                                                                                                                                                                                                                     |               |
| 7  | Confidentiality               | 27  | How personal information about potential and enrolled participants will be collected, shared, and maintained in order to protect confidentiality before, during, and after the trial                                                                                                | P13           |
| 8  |                               |     |                                                                                                                                                                                                                                                                                     |               |
| 9  |                               |     |                                                                                                                                                                                                                                                                                     |               |
| 10 | Declaration of interests      | 28  | Financial and other competing interests for principal investigators for the overall trial and each study site                                                                                                                                                                       | P19           |
| 11 |                               |     |                                                                                                                                                                                                                                                                                     |               |
| 12 |                               |     |                                                                                                                                                                                                                                                                                     |               |
| 13 | Access to data                | 29  | Statement of who will have access to the final trial dataset, and disclosure of contractual agreements that limit such access for investigators                                                                                                                                     | P13-14        |
| 14 |                               |     |                                                                                                                                                                                                                                                                                     |               |
| 15 |                               |     |                                                                                                                                                                                                                                                                                     |               |
| 16 | Ancillary and post-trial care | 30  | Provisions, if any, for ancillary and post-trial care, and for compensation to those who suffer harm from trial participation                                                                                                                                                       | NA            |
| 17 |                               |     |                                                                                                                                                                                                                                                                                     |               |
| 18 |                               |     |                                                                                                                                                                                                                                                                                     |               |
| 19 |                               |     |                                                                                                                                                                                                                                                                                     |               |
| 20 | Dissemination policy          | 31a | Plans for investigators and sponsor to communicate trial results to participants, healthcare professionals, the public, and other relevant groups (eg, via publication, reporting in results databases, or other data sharing arrangements), including any publication restrictions | P19           |
| 21 |                               |     |                                                                                                                                                                                                                                                                                     |               |
| 22 |                               |     |                                                                                                                                                                                                                                                                                     |               |
| 23 |                               |     |                                                                                                                                                                                                                                                                                     |               |
| 24 |                               | 31b | Authorship eligibility guidelines and any intended use of professional writers                                                                                                                                                                                                      | NA            |
| 25 |                               |     |                                                                                                                                                                                                                                                                                     |               |
| 26 |                               | 31c | Plans, if any, for granting public access to the full protocol, participant-level dataset, and statistical code                                                                                                                                                                     | NA            |
| 27 |                               |     |                                                                                                                                                                                                                                                                                     |               |
| 28 |                               |     |                                                                                                                                                                                                                                                                                     |               |
| 29 | <b>Appendices</b>             |     |                                                                                                                                                                                                                                                                                     |               |
| 30 |                               |     |                                                                                                                                                                                                                                                                                     |               |
| 31 | Informed consent materials    | 32  | Model consent form and other related documentation given to participants and authorised surrogates                                                                                                                                                                                  | SM for editor |
| 32 |                               |     |                                                                                                                                                                                                                                                                                     |               |
| 33 |                               |     |                                                                                                                                                                                                                                                                                     |               |
| 34 | Biological specimens          | 33  | Plans for collection, laboratory evaluation, and storage of biological specimens for genetic or molecular analysis in the current trial and for future use in ancillary studies, if applicable                                                                                      | NA            |
| 35 |                               |     |                                                                                                                                                                                                                                                                                     |               |
| 36 |                               |     |                                                                                                                                                                                                                                                                                     |               |

\*It is strongly recommended that this checklist be read in conjunction with the SPIRIT 2013 Explanation & Elaboration for important clarification on the items. Amendments to the protocol should be tracked and dated. The SPIRIT checklist is copyrighted by the SPIRIT Group under the Creative Commons [“Attribution-NonCommercial-NoDerivs 3.0 Unported”](https://creativecommons.org/licenses/by-nc-nd/3.0/) license.

# BMJ Open

## Effectiveness and safety of early intramuscular botulinum toxin injections to prevent shoulder deformity in babies with brachial plexus birth injury (POPB-TOX), a randomized controlled trial: study protocol

|                                 |                                                                                                                                                                                                                                                                                                                                                                                                                                                                                                                                                                                                                                                                                                                                                                                                                                                                                                                                                                                                              |
|---------------------------------|--------------------------------------------------------------------------------------------------------------------------------------------------------------------------------------------------------------------------------------------------------------------------------------------------------------------------------------------------------------------------------------------------------------------------------------------------------------------------------------------------------------------------------------------------------------------------------------------------------------------------------------------------------------------------------------------------------------------------------------------------------------------------------------------------------------------------------------------------------------------------------------------------------------------------------------------------------------------------------------------------------------|
| Journal:                        | <i>BMJ Open</i>                                                                                                                                                                                                                                                                                                                                                                                                                                                                                                                                                                                                                                                                                                                                                                                                                                                                                                                                                                                              |
| Manuscript ID                   | bmjopen-2019-032901.R1                                                                                                                                                                                                                                                                                                                                                                                                                                                                                                                                                                                                                                                                                                                                                                                                                                                                                                                                                                                       |
| Article Type:                   | Protocol                                                                                                                                                                                                                                                                                                                                                                                                                                                                                                                                                                                                                                                                                                                                                                                                                                                                                                                                                                                                     |
| Date Submitted by the Author:   | 28-Aug-2019                                                                                                                                                                                                                                                                                                                                                                                                                                                                                                                                                                                                                                                                                                                                                                                                                                                                                                                                                                                                  |
| Complete List of Authors:       | Pons, Christelle; Fondation ILDYS; Laboratory of Medical Information Processing, INSERM UMR 1101<br>Eddi, Dauphou; CHRU de Brest<br>Le Gal, G.; Centre Hospitalier Universitaire de Brest, Centre for Clinical Investigation INSERM CIC 1412<br>Garetier, Marc; Hopital d'Instruction des Armees Clermont-Tonnerre, Radiology; Laboratory of Medical Information Processing, INSERM UMR 1101<br>Ben Salem, Douraied; CHRU de Brest, Radiology; Laboratory of Medical Information Processing, INSERM UMR 1101<br>Houx, Laetitia; Centre Hospitalier Universitaire de Brest, Physical Medicine and Rehabilitation Department, Brest, France<br>Fitoussi, Franck; Hopital Armand-Trousseau<br>Quintero, Nathaly; Hopitaux de Saint-Maurice, Physical Medicine and Rehabilitation<br>Brochard, Sylvain; Centre Hospitalier Universitaire de Brest, Physical Medicine and Rehabilitation Department, Brest, France; Laboratory of Medical Information Processing, INSERM UMR 1101<br>POPBtox group, POPBtox group |
| <b>Primary Subject Heading</b>: | Rehabilitation medicine                                                                                                                                                                                                                                                                                                                                                                                                                                                                                                                                                                                                                                                                                                                                                                                                                                                                                                                                                                                      |
| Secondary Subject Heading:      | Paediatrics                                                                                                                                                                                                                                                                                                                                                                                                                                                                                                                                                                                                                                                                                                                                                                                                                                                                                                                                                                                                  |
| Keywords:                       | brachial plexus birth injury, Shoulder < ORTHOPAEDIC & TRAUMA SURGERY, botulinum toxin, bone deformity                                                                                                                                                                                                                                                                                                                                                                                                                                                                                                                                                                                                                                                                                                                                                                                                                                                                                                       |
|                                 |                                                                                                                                                                                                                                                                                                                                                                                                                                                                                                                                                                                                                                                                                                                                                                                                                                                                                                                                                                                                              |

SCHOLARONE™  
Manuscripts

1  
2  
3 **Effectiveness and safety of early intramuscular botulinum toxin injections**  
4 **to prevent shoulder deformity in babies with brachial plexus birth injury**  
5 **(POPB-TOX), a randomized controlled trial: study protocol**  
6  
7  
8  
9

10  
11 Christelle Pons MD, PhD<sup>1,2,3</sup> ; Dauphou Eddi PhD<sup>4</sup> ; Grégoire le Gal MD, PhD<sup>5</sup> ; Marc  
12 Garetier MD<sup>2,6</sup> ; Douraied Ben Salem MD, PhD<sup>2,7,8</sup> ; Laetitia Houx MD<sup>1,2,3</sup> ; Franck Fitoussi  
13 MD, PhD<sup>9</sup> ; Nathaly Quintero MD<sup>10</sup> ; Sylvain Brochard MD, PhD<sup>1,2,3,8</sup> ; and the POPB-TOX  
14 Group  
15

- 16  
17  
18  
19 1 Pediatric rehabilitation, Fondation ILDYS, Brest, France  
20 2 Laboratory of Medical Information Processing, INSERM 1101, Brest, France  
21 3 PMR department, Brest CHRU, Brest, France  
22 4 DRCI, Brest CHRU, Brest, France  
23 5 Centre for Clinical Investigation INSERM CIC 1412, Brest CHRU, Brest, France  
24 6 Radiology department, hôpital d'Instruction des Armées Clermont-Tonnerre, Brest,  
25 France  
26 7 Radiology department, Brest CHRU, Brest, France  
27 8 Université de Bretagne Occidentale, Brest, France  
28 9 CHU Paris Est - Hôpital d'Enfants Armand-Trousseau; Paris, France  
29 10 Hôpitaux de St Maurice, St Maurice, France  
30  
31

32  
33 Corresponding author

34 Christelle Pons

35 SSR pédiatrique brestois, Fondation ILDYS, rue Alain Colas, 29200 Brest

36 Tel : 0256310145

37 [christelle.ponsbecmeur@ildys.org](mailto:christelle.ponsbecmeur@ildys.org)  
38  
39

40 Word count : 5441  
41  
42  
43  
44  
45  
46  
47  
48  
49  
50  
51  
52  
53  
54  
55  
56  
57  
58  
59  
60

## ABSTRACT

### Introduction

In children with Brachial Plexus Birth Injury (BPBI), denervation of the shoulder muscles leads to bony deformity in the first months of life, reducing active and passive range of motion (ROM), and causing activity limitation. The aim of this multicentre randomised controlled trial is to evaluate the effectiveness of botulinum toxin injections (BTI) in the shoulder internal rotator muscles of 12 month-old babies in limiting the progression of posterior subluxation of the glenohumeral joint, compared with a sham procedure mimicking BTI. The secondary aims are to evaluate the effectiveness of BTI in (I) limiting the progression of glenoid retroversion and 3D deformity and (II) improving shoulder range of motion and upper limb function, as well as to confirm the tolerance of BTI.

### Methods and analysis

Sixty-two babies with unilateral BPBI and a risk of posterior humeral head subluxation will be included. Only those with at least 7% posterior subluxation of the humeral head compared with the contralateral shoulder on the MRI will be randomized to one of two groups: "BTI" and "Sham". The BTI group will receive BOTOX injections at the age of 12 months in the internal shoulder rotator muscles (8UI/kg). The sham group will undergo a sham BTI procedure. Both groups will undergo repeated shoulder MRI at 18 months of age to quantify changes in the percentage of posterior migration of the humeral head (primary outcome), glenoid version and 3D bone deformity. Clinical evaluations (passive shoulder range of motion, Active Movement Scale) will be carried out at baseline and 15 and 18 months of age. The mini Assisting Hand Assessment will be rated between 10 and 11 months, and at 18 months of age. Adverse events will be recorded at least monthly for each child.

### Ethics and dissemination

Full ethical approval for this study has been obtained. The findings will be disseminated in peer-reviewed publications.

### Trial registration number

EudraCT: 2015-001402-34 in European Clinical Trial database; NCT03198702 in Clinical Trial database.

Keywords: Brachial Plexus Birth Injury, shoulder, botulinum toxin, bone deformity

### Strengths and limitations of this study

1  
2  
3 34 We expect botulinum toxin injections to limit shoulder deformity and improve shoulder range  
4  
5 35 of motion in children with brachial plexus birth injury.  
6  
7 36 This randomized controlled study will evaluate the safety and effectiveness of early botulinum  
8  
9 37 toxin injections in the shoulder internal rotator muscles.  
10  
11 38 The effect on bony deformities (glenohumeral subluxation and glenoid version), active and  
12  
13 39 passive range of motion and upper limb function will be evaluated.  
14  
15 40  
16 41

## 42 INTRODUCTION

43  
44  
45 Brachial Plexus Birth Injury (BPBI) refers to injury to one or more cervical nerve roots  
46  
47 (C5-C8) and/or the first thoracic nerve root (T1), usually caused by traction during a difficult  
48  
49 birth. The incidence is around 1.5 per 1000 births[1]. In one third of cases, nerve recovery is  
50  
51 incomplete or absent[1,2], resulting in permanent impairment which in turn may lead to activity  
52  
53 limitation and participation as defined by the International Classification of Functioning[3,4].

54  
55 BPBI greatly affects the musculoskeletal development of the shoulder complex[3,5,6].  
56  
57 Deformities occur very early, within the months following birth[6–8], and gradually worsen  
58  
59 with the child's growth[7,9]. Bony and joint deformities are caused by the partial denervation  
60  
61 of the shoulder muscles, which results in an imbalance of the forces acting on the glenohumeral  
62  
63 joint [6,10]. In particular, there is often a dominance of the internal rotator muscles [11,12].  
64  
65 Excess glenoid retroversion is typical, along with deformation of the glenoid fossa. This allows  
66  
67 posterior migration of the humeral head to occur, eventually progressing to complete  
68  
69 subluxation[6–8,13]. These deformities increase the risk of early degenerative joint changes  
70  
71 and pain during childhood and adulthood[14,15]. Active and passive shoulder range of motion  
72  
73 (ROM) are also reduced, causing a vicious circle in which the muscles cannot contract  
74  
75 effectively because of the bony deformities and altered lever arms [9]. These changes reduce  
76  
77 the functional capacity and quality of life of children with BPBI[16,17].

78  
79 Botulinum toxin injections (BTI) are a common treatment to reduce muscle activity. This  
80  
81 treatment is mostly used to treat spasticity in children, particularly in the case of cerebral  
82  
83 palsy[18], however it may also be useful in children with BPBI[19,20], combined with other  
84  
85 treatments such as physiotherapy, occupational therapy, orthoses and, in some cases, surgery.  
86  
87 The dominant internal shoulder rotator muscles are often targeted in order reduce the strength  
88  
89 imbalance between agonist and antagonist muscles [21]. One study suggested that BTI might  
90  
91 be useful to reduce posterior subluxation or dislocation of the shoulder in babies with BPBI[22].

1  
2  
3 69 BTI could also improve passive and active shoulder ROM and functional capacity[20,23,24].  
4  
5 70 BTI is a minimally invasive treatment that is well tolerated in young children [25]. When used  
6  
7 71 prior to surgery, it could avert or reduce the complexity of surgical secondary orthopaedic  
8  
9 72 procedures (e. g. subscapularis release, latissimus dorsi and teres major transfers) [22,23].  
10  
11 73 Although the results of studies of early BTI for BPBI are encouraging, most studies are  
12  
13 74 retrospective, include small samples and do not have a control group. The current level of  
14  
15 75 evidence is thus insufficient to make robust conclusions regarding the effectiveness of  
16  
17 76 botulinum toxin injections in children with brachial plexus birth injury.

17 77 Randomized controlled trials to evaluate the efficacy of early BTI and to confirm its  
18  
19 78 tolerance in children with BPBI are therefore now warranted. With regard to the control  
20  
21 79 treatment, a sham procedure mimicking BTI without injection is ethically more appropriate  
22  
23 80 than an invasive placebo procedure because of the young age of the children involved.

24 81

## 25 82 **AIMS and HYPOTHESES**

26 83

### 27 84 **Aims**

28  
29 85 The main aim of this study is to evaluate the effectiveness of BTI in the internal shoulder  
30  
31 86 rotator muscles of 12 month-old babies in limiting the progression of posterior subluxation of  
32  
33 87 the glenohumeral joint.

34  
35 88 The secondary aims are (I) to compare the effectiveness of BTI with a sham treatment  
36  
37 89 in limiting the progression of glenoid retroversion and three-dimensional glenoid deformity;  
38  
39 90 (II) to compare the effectiveness of BTI with a sham treatment in improving active and passive  
40  
41 91 joint range of motion and upper limb function; (III) to assess the tolerance of BTI in babies with  
42  
43 92 BPBI; (IV) to evaluate the effects of BTI on muscle growth and fatty infiltration of the injected  
44  
45 93 muscles, as well as muscle volume balance around the shoulder, and (V) to determine the long-  
46  
47 94 term effect of BTI on frequency and type of surgical interventions.

48 95

### 49 96 **Hypotheses**

50  
51 97 Our primary hypothesis is that BTI will limit posterior subluxation of the glenohumeral  
52  
53 98 joint in the BTI group compared with the Sham group.

54  
55 99 We further hypothesize that the progression of glenoid retroversion and three-  
56  
57 100 dimensional deformities will be reduced, that active and passive range of motion will be  
58  
59 101 increased, and that number of secondary surgical interventions will be reduced in the BTI group  
60  
102 compared with the Sham group. The robust design of this study will confirm the results of



1  
2  
3 103 previous un-controlled studies, providing a strong level of evidence for BTI treatment. We also  
4 104 hypothesize that BTI will be well tolerated by the babies [25]. With regards to morphological  
5 105 changes following BTI, we expect slight atrophy to occur in the injected muscles, with some  
6 106 fatty infiltration [26] but no change in non-injected muscles, leading to an improvement in the  
7 107 volume balance of agonist and antagonist muscles [27].  
8  
9  
10  
11  
12

## 13 109 **METHODS/DESIGN**

### 14 110 15 111 16 112 17 113 **Design**

18 114 A randomised, multicentre, double-blind, controlled, parallel group, superiority trial  
19 115 will be performed (version 3, 17.01.2018). One group will receive BTI and the other will  
20 116 undergo a Sham procedure.  
21  
22  
23  
24

### 25 117 26 118 **Ethics**

27 119 Full ethical approval for this study has been obtained by the ethical committee Ouest 1  
28 120 of Tours and Agence Nationale de Sécurité du Médicament et des produits de santé (ANSM).  
29 121 The trial has been registered in the European Clinical Trial database (EudraCT: 2015-001402-  
30 122 34) and Clinical Trial database (NCT03198702). All families will be given a written  
31 123 information letter detailing the study and parents or guardians will sign informed consent prior  
32 124 to the child's inclusion. Any modification or amendment to the protocol will be submitted to  
33 125 the ethical committees and ANSM for approval. After approval, investigators and trial  
34 126 participants will be informed of the changes by letter or email. All trial databases will also be  
35 127 updated.  
36  
37  
38  
39  
40  
41  
42  
43  
44

### 45 128 46 129 **Recruitment**

47 130 The sponsor is CHRU Brest. Babies will be recruited from six French hospitals (CHRU  
48 131 Brest, Centre de Réadaptation pour enfant Flavigny-sur-Moselle, Hôpital National de Saint  
49 132 Maurice, CHU Saint-Etienne, CHU Nîmes, CHU Rennes), all of which are specialized in the  
50 133 management of children with brachial plexus palsy and have access to MRI. All doctors  
51 134 involved are skilled in BTI. Hospitals were selected by the study coordinator and sponsor based  
52 135 on their responses to a feasibility questionnaire. It is predicted that during the 29 months of  
53 136 inclusion, around 2590 children will be born with BPBI in France [1], of whom 466 will left  
54 137 with sequelae[1]. This study will recruit 13.5% of these babies (62 patients over 29 months).  
55  
56  
57  
58  
59  
60

1  
2  
3 137 maternity units about the study, and flyers and posters will be displayed in the reception areas  
4  
5 138 of clinics and maternity units. Clinicians will be asked to refer babies with OBBP to their nearest  
6  
7 139 participating specialist centre and they will be provided with information leaflets to give to the  
8  
9 140 parents. External advertising will also include a webpage on the Brest CHRU website. If  
10  
11 141 inclusion goals are not achieved, more centers will be asked to participate.

12 142 A rehabilitation physician and/or a surgeon in each participating specialist centre will  
13  
14 143 identify potentially eligible babies for the study during routine consultations. The protocol will  
15  
16 144 be explained and proposed to parents of babies between 10 and 11 months of age who have a  
17  
18 145 high risk of bony deformity. An information letter will be given to the parents. If the parents  
19  
20 146 agree to their baby's participation, and the baby fulfils the inclusion criteria, he or she will be  
21  
22 147 enrolled in the study for 7 months.

23 148 The inclusion criteria are: male or female babies aged between 10 and 11 months with  
24  
25 149 unilateral BPBI; at least one of the following risk factors for posterior subluxation of the  
26  
27 150 humeral head: 10° less passive external ROM of the affected shoulder compared with the  
28  
29 151 contralateral shoulder and/ or a score below 6 on the Active Movement Scale (AMS) for  
30  
31 152 shoulder external rotation and abduction, elbow flexion or supination; whose parents or  
32  
33 153 guardians have signed the consent form. Babies with bilateral BPBI, microsurgery or shoulder  
34  
35 154 muscle surgery planned between 12 and 18 months of age, contraindications to the use of  
36  
37 155 botulinum toxin (hypersensitivity to botulinum toxin or the excipients used, or myasthenia),  
38  
39 156 contraindications to MRI (pace maker, metal implants, foreign metal body in the eye, etc.), MRI  
40  
41 157 not possible in the Paediatric Day Hospital setting because of contraindications to the  
42  
43 158 premedication protocol or organizational constraints, parents inapt to provide consent for the  
44  
45 159 participation of their child, or parents under the age of 18 years, will be excluded.

46 160

### 47 161 **Study procedure**

48 162 The study procedure is described in figure 1 and table 1.

49 163 At visit 1 (between 10 and 11 months of age), the parents or guardians will sign the  
50  
51 164 informed consent form and the baby will be included. The physician or surgeon will carry out  
52  
53 165 a physical examination and will collect socio-demographic data including history of BPBI in a  
54  
55 166 brother or sister, overweight or obesity of the mother, any medical conditions during the  
56  
57 167 pregnancy (e.g. gestational diabetes), the birth procedure (caesarean section, vaginal delivery  
58  
59 168 with epidural, induction of labour, instrumental delivery, shoulder dystocia, term and duration),  
60  
61 169 birth weight and length, and APGAR score.

1  
2  
3 170 Visit 2 (at 11 months of age) will involve MRI to confirm the diagnosis of bony  
4  
5 171 deformity (the humeral head on the involved side must be at least 7% more posterior than the  
6  
7 172 humeral head on the contralateral side). Once confirmed, randomisation will be carried out.  
8  
9 173 This will ensure that only babies with verified glenohumeral deformity are included, since  
10  
11 174 clinical tests are not sufficiently sensitive to confirm this. Babies who do not fulfil this  
12  
13 175 randomisation criterion will be withdrawn from the study and will pursue the usual medical  
14  
15 176 follow-up. The parents will be informed of the results of the MRI within 10 days by means of  
16  
17 177 a telephone call from the research investigators. The randomisation will allocate the babies to  
18  
19 178 one of two treatment groups (each with the same number of babies): BTI group and sham group.

18 179 Visit 3 (12 months +/-15 days of age) will include treatment (BTI or sham procedure).

20 180 Both groups will then attend seven follow up visits: visit 4 will be carried out ten days  
21  
22 181 after treatment administration, and visits 6-10 will be carried out each month until 18 months  
23  
24 182 of age. Visits 1, 7 and 10 will involve a standardized clinical examination by occupational  
25  
26 183 therapists or physiotherapists and visits 5, 6, 8 and 9 will involve a telephone call from a  
27  
28 184 member of the study team.

29 185 Un-blinding will be performed at visit 10 (18-months of age). Following un-blinding,  
30  
31 186 the baby will attend a follow-up visit at 24 months then yearly follow-up visits, as is usual  
32  
33 187 practice. The aim of this is to determine the safety of the use of botulinum toxin before the age  
34  
35 188 of two years (after which there is a marketing authorization for children with cerebral palsy),  
36  
37 189 and to compare the frequency and complexity of surgical interventions between groups until  
38  
39 190 the age of 10 years.

39 191

## 41 192 **MRI**

42  
43 193 The babies included in this study will undergo MRI of both shoulders at visits 2 and 10  
44  
45 194 (at 11 and 18 months of age). A three-dimensional, T1-weighted gradient-echo sequence will  
46  
47 195 be used. This anatomical sequence highlights bones and muscles, including denervated  
48  
49 196 muscles[28]. The child will lie supine with his/her arms in neutral and hands pronated. The T1  
50  
51 197 protocol[27] will be adapted in each centre depending on the type of MRI scan they have.  
52  
53 198 Acquisition time will be less than 5 minutes per shoulder. No contrast injection will be required.  
54  
55 199 Images will have to include sternum and spine medially, the whole deltoid laterally and the  
56  
57 200 spine of the scapula at the back down. Premedication (sedation or general anaesthetic) will be  
58  
59 201 necessary for both MRI exams, at 11 and 18 months of age. The premedication will be adapted  
60  
202 to the clinical status of each child and the customs of each centre. After premedication, the child  
203 will be monitored by a paediatrician in the day hospital of each centre using a validated protocol.

204

### 205 **Randomisation process and blinding**

206 Randomisation will be carried out using centralised computer randomisation by Internet,  
207 according to the usual procedures in effect at Brest Regional University Hospital. After MRI  
208 confirmation that the baby fulfils the randomisation criterion (visit 2), randomisation will be  
209 performed by the study investigator on the day of the injection visit (visit 3, 12 months of age).  
210 Randomization will be carried out via a specific dedicated website ([https://chu-brest.hugo-  
211 online.fr/CSOnline/](https://chu-brest.hugo-online.fr/CSOnline/)). This website is available 24 hours a day.

212 Stratification will be carried out by centre and by microsurgery prior to inclusion, since early  
213 surgery could influence the progression of bony deformity. Only the physician who will  
214 perform the BTI and the pharmacist will receive the email specifying the randomization arm of  
215 each baby. Neither the parents or guardians, nor the clinical and radiological evaluators will be  
216 aware of the treatment administered. The doctors carrying out the BTI will not take part in  
217 subsequent visits, to ensure the blinding of the examiner. A central analysis of MRI data will  
218 be carried out in order to ensure blinding of the evaluator to the primary outcome measure.

219

### 220 **Study Treatments**

#### 221 **BTI procedure**

222 The botulinum toxin that will be used in the study is BOTOX (Allergan, Dublin,  
223 Ireland). Doses will be injected into the pectoralis major, subscapularis and teres  
224 major/latissimus dorsi muscles in a single site for each muscle on one occasion (visit 3:  
225 12months +/- 15 days of age). These muscles have been the target of BTI treatment to prevent  
226 the progression of humeral head subluxation and to improve active and passive shoulder ROM  
227 in previous studies of children with BPBI[22]. Following reconstitution, the toxin will be  
228 injected intramuscularly using a transcutaneous approach with a 27 gauge, 25mm long sterile  
229 needle. Ultrasound guidance will be used to identify the muscles. A detailed protocol has been  
230 written to ensure standardization of the procedure (supplementary file 1). The chosen doses are  
231 based on data in the literature in children and babies with BPBI[20,22,23]: a total of 8U/kg will  
232 be injected (2U/kg in subscapularis, 3U/kg in pectoralis major and 3U/kg in teres  
233 major/latissimus dorsi). Because there is no marketing authorisation for the use of botulinum  
234 toxin in children under the age of two years, the chosen doses are smaller than the maximal  
235 doses authorized for the treatment of spasticity in older children with cerebral palsy. Moreover,  
236 the doses chosen correspond with doses used in previous studies. A standardized protocol for  
237 the prevention and treatment of induced pain and post-injection pain will be systematically

1  
2  
3 238 used. This will involve the administration of topical anaesthesia (such as EMLA) and  
4  
5 239 paracetamol (dose according to the baby's weight) one hour prior to the injection. Distraction  
6  
7 240 techniques will be used during the injection. The parents will be instructed to bring reassuring,  
8  
9 241 familiar objects belonging to the baby (e.g. soft toy, pacifier, nursery rhyme, music). In order  
10  
11 242 to standardize practices and to ensure maximum safety and efficacy, staff from the different  
12  
13 243 centres will all be trained in BTI of the shoulder muscles using ultrasound guidance in babies  
14  
15 244 prior to participating in the study. Only physicians with at least five years of experience in BTI  
16  
17 245 will be authorized to perform the injections.

#### 18 19 247 Sham procedure

20  
21 248 The aim of the Sham procedure is to mimic the BTI and to maintain the blinding of the  
22  
23 249 research team and the parents or guardians. The same anesthetic procedure will be carried out  
24  
25 250 as for BTI. The physician performing the injection will prepare a syringe containing  
26  
27 251 physiological saline solution 10 minutes prior to the Sham procedure. The procedure will be  
28  
29 252 simulated with ultrasound and use of a blunt needle (that will not penetrate the skin) on the sites  
30  
31 253 selected for injection. All sites will be covered with adhesive dressings and tincture of betadine,  
32  
33 254 as for the BTI. With regard to the control treatment, a sham procedure mimicking BTI without  
34  
35 255 injection is ethically more appropriate than an invasive placebo procedure because of the young  
36  
37 256 age of the children involved.

#### 38 258 Rehabilitation and medical follow up

39  
40 259 To ensure comparability, the babies in both groups will receive 2 sessions of physiotherapy per  
41  
42 260 week. Physiotherapy will be standardized and based on evidence from studies of early  
43  
44 261 physiotherapy management [29,30]. It will involve: (I) maintaining passive range of motion of  
45  
46 262 all the upper limb joints, in particular shoulder external rotation, elbow extension and forearm  
47  
48 263 pronation; (II) active-assisted and active movements of the involved shoulder; (III) bimanual  
49  
50 264 functional training; (IV) training to integrate the involved upper limb in functional activities  
51  
52 265 and (V) parent education: child positioning, stimulation of active movement and function at  
53  
54 266 home. A standardized medical prescription will be given. An information and advice letter will  
55  
56 267 be given to the physiotherapists via the parents to standardize and optimise physiotherapy  
57  
58 268 treatment. Advice will be given to parents regarding exercises to carry out at home, they will  
59  
60 269 be taught to encourage use of the upper limb at home. All other medical treatment and  
270  
271 270 rehabilitation will be carried out according to usual procedures.

1  
2  
3 272 **Adverse events**

4  
5 273 Adverse events relating to the use of botulinum toxin

6 274 The secondary effects of BTI are mostly mild, temporary and related to the dose and the  
7  
8 275 injection site. Local reactions such as contusions or pain at the injection site may occur, or  
9  
10 276 excessive, localised muscle weakness. Systemic effects are rare and include generalised allergic  
11  
12 277 reactions and effects related to product diffusion (rash, erythema, pruritus, anaphylactic  
13  
14 278 reaction, flu-like syndrome, headaches, dizziness, fever, shivering, hypertension, and  
15  
16 279 abdominal pain and dry mouth). Exceptionally, serious effects have been observed, a type of  
17  
18 280 excessive muscle weakness, dysphagia and aspiration pneumonia, however these occurred  
19  
20 281 principally when the recommended doses were not respected[25,31–33]. The safety of BTI in  
21  
22 282 infants under two years of age was shown to be good in a recent systematic review[25] and the  
23  
24 283 tolerance of this treatment also seems good in this population[22,33,34]. The specific effects  
25  
26 284 on muscle structure and the contractile properties of muscles are, however, poorly understood.  
27  
28 285 Moderate muscle atrophy and fatty infiltration may occur following injections[26,35,36].

27 286 According to the usual procedure used for the injection of botulinum toxin in each  
28  
29 287 hospital, an information sheet will be provided to each patient explaining the action to be taken  
30  
31 288 in the case of an adverse effect. According to this procedure, parents will be instructed to  
32  
33 289 urgently consult their general practitioner or the pediatric emergency department in the case of  
34  
35 290 the occurrence of a serious adverse effect such as generalized weakness or cardio-respiratory  
36  
37 291 insufficiency. There is no antidote to botulinum toxin therefore symptomatic treatment will be  
38  
39 292 administered, if required.

39 293 In the case of a serious adverse event, unblinding will be carried out. If an investigator  
40  
41 294 wishes to treat the child with aminoglycosides, which are contraindicated in the case of  
42  
43 295 treatment by botulinum toxin, unblinding will be carried out.

44 296 Parents will be questioned regarding adverse events at 10 days and then monthly  
45  
46 297 between 12 and 18 months of age using standardized questionnaires that include all possible  
47  
48 298 side effects.

49 299

50  
51 300 Adverse events related to MRI premedication

52  
53 301 The risks related to the premedication are the standard risks for the sedation or  
54  
55 302 anaesthesia of children (gastritis, anticholinergic effects, oxygen desaturation, excessive  
56  
57 303 sedation). The child will be examined for potential risks during a routine paediatric or  
58  
59 304 anaesthetic consultation.

60 305



1  
2  
3 306 Independent Data Monitoring Committee and un-blinding procedure

4  
5 307 An independent data safety monitoring Committee (DSMC) comprised of five  
6  
7 308 independent members will be set up. The purpose of the DSMC will be to provide an  
8  
9 309 independent evaluation of any adverse events that occur during the research, as well as to  
10  
11 310 monitor the benefit / risk ratio.

12 311 Should an adverse event that requires different care than that planned in the study occur,  
13  
14 312 unblinding will be carried out. Unblinding will not be carried out in any other condition.

15 313

16  
17 314 **Patient and Public involvement statement**

18  
19 315 Patients were not involved in the development of the research, and will not be involved  
20  
21 316 in the recruitment and conduct of the study. Results of the study will be given to the parents  
22  
23 317 after the study during a medical consultation in their participating center.

24 318

25 319 **OUTCOME MEASURES**

26 320

27 321 **Primary Outcome**

28  
29 322 The primary outcome measure is the change in the percentage of posterior migration of  
30  
31 323 the humeral head measured on an axial MRI image between 11 months (before the BTI at 12  
32  
33 324 months) and 18 months of age (6 months post BTI) at visits 2 and 10 (table 1). Posterior  
34  
35 325 subluxation will be evaluated using the method described by Waters, on an axial MRI slice  
36  
37 326 taken just below the coracoid process [37–39]. Percentage posterior subluxation will be  
38  
39 327 calculated in the following manner: a line will be traced from the medial border of the scapula  
40  
41 328 to the middle of the glenoid fossa. A segment will then be drawn perpendicularly to the line,  
42  
43 329 from the widest part of the humeral head (AC). The length of the anterior part of this segment  
44  
45 330 (AB) divided by the (AC) segment will be multiplied by 100 to obtain the percentage migration  
46  
47 331 of the humeral head. A percentage below 50% indicates posterior migration of the humeral  
48  
49 332 head. This measurement is quick to carry out and is used in both research and routine clinical  
50  
51 333 practice in children and babies with BPBI to help preoperative decision making for the type of  
52  
53 334 intervention and post-operative follow up[6,8,39]. Intra- and inter-rater reliability have been  
54  
55 335 shown to be excellent, with a 7% estimated measurement error [38]. MRI data will be analysed  
56  
57 336 centrally (at Brest CHRU) by two trained investigators using the same guidelines in order to  
58  
59 337 minimise inter-rater variability and to ensure the blinding of the evaluator.

58 338

59 339 **Secondary Outcome Measures**



1  
2  
3 340 Glenoid retroversion and three-dimensional deformity

4  
5 341 The following MRI measurements will be compared at visits 2 and 10 (11 and 18 months  
6  
7 342 of age) (table 1) to determine the effectiveness of BTI relative to the sham treatment in limiting  
8  
9 343 the progression of glenoid retroversion and three-dimensional deformity:

10 344 1) 2D glenoid version will be measured on an axial image using Friedman's  
11  
12 345 technique[40]. This measurement has been validated and is used in clinical practice  
13  
14 346 and research[10,38].

15 347 2) 3D glenoid version and 3D migration of the humeral will be measured on MRIs  
16  
17 348 following 3D reconstruction. These original measurements were recently used for  
18  
19 349 the first time[41] and will provide an evaluation of 3D shoulder deformity and the  
20  
21 350 effect of BTI on the deformity.

22 351

23  
24 352 Passive and active movement and upper limb function

25 353 Three standardized evaluations will be carried out by occupational therapists or  
26  
27 354 physiotherapists to compare the effect of BTI and the sham treatment on active and passive  
28  
29 355 joint range of motion and upper limb function. All therapists will undergo training prior to their  
30  
31 356 involvement in the study in order to ensure the reliability of measures.

32 357 1) Passive shoulder ROM will be measured at the baseline (before the MRI at visit 1,  
33  
34 358 between 10 and 11 months of age), at visits 7 and 10 (15-months and 18-months of  
35  
36 359 age visits).

37 360 2) The AMS (Active Movement Scale) will be rated at baseline (before the MRI at visit  
38  
39 361 1, between 10 and 11 months of age), and at visits 7 and 10 (15-months and 18-  
40  
41 362 months of age visits). This test evaluates upper limb strength in babies with BPBI  
42  
43 363 during active movements. Each movement is rated on an 8-point scale from 0 (no  
44  
45 364 movement) to 7 (complete movement against gravity). It has satisfactory  
46  
47 365 psychometric properties[42,43] in trained therapists.

48 366 3) The Mini-AHA (Mini-assistive Hand Assessment) will be rated at visit 1 and 10  
49  
50 367 (baseline and the 18-months of age visits). This functional evaluation measures  
51  
52 368 bimanual performance during games and tasks. It was designed for children aged  
53  
54 369 from 8 to 18 months[44].

55 370

56 371 Tolerance

57  
58  
59  
60

1  
2  
3 372 The parents of the babies in both groups will be questioned at 10 days and each month  
4 373 between 12 and 18 months of age using a standardized questionnaire that includes a list of all  
5 374 possible side effects of BTI.  
6  
7

8 375

9  
10 376 Changes in muscle structure (BTI group only)

11 377 3D MRI reconstruction[27] and the validated technique described by Hogendoorn et  
12 378 al.[45] will be used to respectively evaluate the direct effects of BTI injections on muscle  
13 379 volume and fatty infiltration of the shoulder muscles. This evaluation will only be carried out  
14 380 in the BTI group.  
15  
16  
17

18 381

19 382 Future surgical interventions

20 383 To determine if BTI reduces the frequency and complexity of surgical interventions in  
21 384 the long term, surgical procedures undergone by the children in both groups (recorded during  
22 385 routine medical follow-up) will be compared up to the age of 10 years.  
23  
24  
25  
26  
27

28 386

29 387 **Locations and data management**

30 388 Each centre will manage their own recruitment of babies and organization of MRIs,  
31 389 clinical evaluations and treatment. Electronic data will be secured and analyzed in a central  
32 390 database managed by the Brest CHRU. Data will be the property of CHRU Brest.  
33  
34  
35

36 391 In accordance with Good Clinical Practice (GCP) guidelines, the sponsor is in charge of  
37 392 obtaining agreement from all centers involved in the clinical research, in order to guarantee  
38 393 direct access to all the clinical research sites, to all the source data, source documents and all  
39 394 the reports for the purpose of Quality Control and audit by the sponsor.  
40  
41  
42

43 395 All information required for the study will be entered in the paper case report forms  
44 396 during evaluations, then transferred to the electronic case report form (Clinsigth). Items of  
45 397 missing data will be coded. Each centre will be responsible for completing the CRFs for the  
46 398 babies enrolled in their centre. Each investigator will receive an instruction document regarding  
47 399 the use of this tool. The investigator will be responsible for the accuracy, quality and relevance  
48 400 of all the data entered. In addition, the data will be immediately verified as they are entered,  
49 401 using consistency checks. The investigator must validate any changes to the values in the CRF.  
50 402 These modifications will be subject to an audit trail. A justification can be added when  
51 403 applicable, as a comment. Data management and query processing will be carried out by a data  
52 404 manager.  
53  
54  
55  
56  
57  
58  
59  
60

1  
2  
3 406 A Clinical Research Assistant (CRA) appointed by the sponsor will ensure the good  
4  
5 407 running of the study, data collection on the paper CRF, data recording in the electronic CRF,  
6  
7 408 data saving and reporting in accordance with the sponsor's Standardized Operating Procedures  
8  
9 409 as well as the GCP guidelines and current legislation and laws in force.

10 410 The investigator and the members of his/her team will agree to be available during all the  
11  
12 411 routine and planned Quality Control visits by the CRA. During these visits, the following will  
13  
14 412 be audited: signed informed consent, compliance with the study protocol and procedures, data  
15  
16 413 recorded in the CRF: accuracy, missing data, consistency between these data and their "source"  
17  
18 414 (medical files, original laboratory results, etc.), product management and investigator file. The  
19  
20 415 investigators agree to accept the quality assurance audits carried out by the sponsor as well as  
21  
22 416 the inspections carried out by the competent authorities. All data, documents and reports may  
23  
24 417 be subject to regulatory audits and inspections. Medical confidentiality cannot be invoked in  
25  
26 418 opposition to these audits and inspections.

27 419 Any data sent to the sponsor by the investigators (or any other specialised parties) during or  
28  
29 420 after the biomedical research will be anonymised. These data should not reveal any visibly  
30  
31 421 accurate names and addresses of enrolled (involved) individuals. Only the first letter of the  
32  
33 422 subject's name and first name will be saved along with a coded number indicating the order of  
34  
35 423 inclusion of the subjects. The sponsor will ensure that the parent of each research subject has  
36  
37 424 given permission in writing for access to personal information about the baby which is strictly  
38  
39 425 necessary for the quality control of the research.

40 426

### 41 427 **Sample size and statistical analysis**

42 428 No longitudinal data regarding the progression of bony deformities in children with  
43  
44 429 BPBI are available in the literature. Only transversal studies have been carried out, indicating  
45  
46 430 that posterior subluxation is significantly greater on the affected side compared with the healthy  
47  
48 431 side at the age of 4.8 months (affected side: 32.1% - SD=19.7% vs. healthy side: 49.8% -  
49  
50 432 SD=7.3%)[6]. The calculation of the number of subjects necessary for this study was based on  
51  
52 433 a difference of one standard deviation at 12 months, for a standard deviation of 5%.

53 434 In order to guarantee a power of 90%, a sample of 22 babies per group is required, thus a total  
54  
55 435 of 44. In order to account for babies lost to follow-up (10%) and babies who will not be treated  
56  
57 436 because of a lack of true subluxation on MRI, 62 babies will be recruited.

58 437 The characteristics of the babies in both groups will be described using means, standard  
59  
60 438 deviations, medians, quartiles or frequencies. Mean changes in 2D percentage humeral  
439 subluxation, 3D humeral subluxation, 2D and 3D glenoid version, the AMS score and passive

1  
2  
3 440 shoulder ROM will be compared using analysis of covariance (ANCOVA) adjusted on the  
4  
5 441 initial values. If the hypotheses underlying the analysis of covariance model are not respected,  
6  
7 442 a non-parametric Wilcoxon test will be used. Shoulder muscle volumes and the mini-AHA  
8  
9 443 scores will be compared between the groups using a Student test or a non-parametric Mann-  
10  
11 444 Whitney test, depending on the distribution of the variable of interest. Lastly, the number of  
12  
13 445 serious and non-serious adverse events, and the degree of fibrosis and fatty infiltration will be  
14  
15 446 compared between the two groups using a Chi2 test or Fisher's exact test, so as the number of  
16  
17 447 secondary surgeries.  $p < 0.05$  will be considered as statistically significant.

18 448 Data analysis will be carried out on an intention to treat basis by a biostatistician after  
19  
20 449 blind review and database freezing at the end of the study. No intermediate analysis is planned  
21  
22 450 during this trial.

23 451

## 24 452 **DISCUSSION**

25 453 This paper presents the background and design for a multicentre double-blind  
26  
27 454 randomised controlled trial to evaluate the effectiveness of BTI in the shoulder internal rotator  
28  
29 455 muscles of 12 months old babies in limiting the progression of posterior subluxation of the  
30  
31 456 glenohumeral joint, compared with a sham procedure. To our knowledge, this is the first study  
32  
33 457 with a sufficiently robust methodology to allow conclusions to be based on a high level of  
34  
35 458 evidence. The study has been approved by national French agencies: the Ministry of Research,  
36  
37 459 the National Ethical Committee and the National Drug Administration.

38 460 The babies included in the study will all receive 2 sessions of physiotherapy per week.  
39  
40 461 This choice was made because it is usual practice for babies with BPBI in France. In addition,  
41  
42 462 studies in other pathologies have shown that physiotherapy potentiates the effectiveness of BTI  
43  
44 463 [46]. Casting will not be used because it is invasive, has a low level of evidence and comports  
45  
46 464 a risk of interference with motor development in children who already have central nervous  
47  
48 465 system abnormalities [47].

49 466 The primary end-point, change in the percentage posterior migration of the humeral  
50  
51 467 head measured on an axial MRI image between 11 months (before BTI) and 18 months of age  
52  
53 468 (6 months post BTI), was chosen for its clinical relevance and its strong psychometric properties  
54  
55 469 compared with clinical or functional assessments in this population. Because the aim of this  
56  
57 470 study is to evaluate both bone deformity and muscle morphology in order to document the  
58  
59 471 consequences of BTI in non-spastic muscles and on shoulder muscle balance, we preferred  
60  
61 472 MRI over ultrasound since MRI can accurately measure both elements while ultrasound cannot.

1  
2  
3 473 Clinical evaluations carried out before and after BTI will determine the effects of the  
4  
5 474 treatment on shoulder ROM and functional capacity. Evaluations will be carried out monthly,  
6  
7 475 with alternate phone contacts and direct consultations in order to limit traveling, promote  
8  
9 476 adherence and limit losses to follow-up. Because there is currently no marketing authorisation  
10  
11 477 for BTI in infants under the age of two years, special attention was paid to the safety assessment.  
12  
13 478 The use of a systematic and detailed questionnaire will yield detailed and specific data,  
14  
15 479 confirming or not the safety of BTI before the age of two years.

16 480 Glenohumeral dysplasia can occur as early as 3 months of age. If this trial has positive  
17  
18 481 results and if the safety of BTI performed at 12 months of age in children with BPBI is proven,  
19  
20 482 studies evaluating the effect of BTI in the limitation of gleno-humeral deformity in younger  
21  
22 483 babies could be warranted.

23 484 The results of the study could lead to a request for an evaluation by the French National  
24  
25 485 Agency for Medicines and Health Products Safety (ANSM) for Temporary Recommendation  
26  
27 486 for Use (TRUs) of botulinum toxin in children with BPBI. It is expected that the results of this  
28  
29 487 trial will be published in peer-reviewed scholarly journals and international academic  
30  
31 488 conferences. After the trial, if positive results are highlighted in the children who had botulinum  
32  
33 489 toxin injections, the treatment will be proposed to the children in the sham group. These  
34  
35 490 children will however be older and the efficacy may be lower, especially for the bone deformity.

#### 34 491 Conclusion

36 492 The POPBTOX trial is a nationwide, multicentre, randomised, controlled study that will  
37  
38 493 evaluate the effectiveness of BTI in the internal shoulder rotator muscles of 12 month-old babies  
39  
40 494 with BPBI in limiting shoulder deformity. Tolerance of the treatment will also be determined.  
41  
42 495 Existing results from uncontrolled studies suggest this treatment may be effective, however the  
43  
44 496 present study will allow robust conclusions to be drawn, potentially leading to a change in the  
45  
46 497 care of these children.

47  
48  
49  
50  
51  
52  
53  
54  
55  
56  
57  
58  
59  
60

**Table 1 : Visits and study procedure**

| <b>Action</b>                                               | <b>Visit 1 : 10 months of age (Inclusion, medical and therapists)</b> | <b>Visit 2: 11 months of age (MRI)</b> | <b>Visit 3: 12 months of age (injection, medical follow-up)</b> | <b>Visit 4: D10 post-injection (medical follow-up)</b> | <b>Visit 5: 13 months of age (Phone call)</b> | <b>Visit 6: 14 months of age (Phone call)</b> | <b>Visit 7 : 15 months of age (medical and therapists)</b> | <b>Visit 8 : 16 months of age (Phone call)</b> | <b>Visit 9 : 17 months of age (Phone call)</b> | <b>Visit 10: 18 months of age (MRI, therapists medical)</b> |
|-------------------------------------------------------------|-----------------------------------------------------------------------|----------------------------------------|-----------------------------------------------------------------|--------------------------------------------------------|-----------------------------------------------|-----------------------------------------------|------------------------------------------------------------|------------------------------------------------|------------------------------------------------|-------------------------------------------------------------|
| <i>Informed consent</i>                                     | X                                                                     |                                        |                                                                 |                                                        |                                               |                                               |                                                            |                                                |                                                |                                                             |
| <i>Incl./excl. criteria</i>                                 | X                                                                     |                                        |                                                                 |                                                        |                                               |                                               |                                                            |                                                |                                                |                                                             |
| <i>Medical history</i>                                      | X                                                                     |                                        |                                                                 |                                                        |                                               |                                               |                                                            |                                                |                                                |                                                             |
| <i>Notification of existing and planned BPBI care</i>       | X* →                                                                  |                                        |                                                                 |                                                        |                                               |                                               |                                                            |                                                |                                                |                                                             |
| <i>Active and passive shoulder range of motion (ROM)</i>    | X* →                                                                  |                                        |                                                                 |                                                        |                                               |                                               | X                                                          |                                                |                                                | X                                                           |
| <i>Active Movement Scale (AMS)</i>                          | X* →                                                                  |                                        |                                                                 |                                                        |                                               |                                               | X                                                          |                                                |                                                | X                                                           |
| <i>MRI of both shoulders</i>                                |                                                                       | X                                      |                                                                 |                                                        |                                               |                                               |                                                            |                                                |                                                | X                                                           |
| <i>mini-AHA Scale</i>                                       | X* →                                                                  |                                        |                                                                 |                                                        |                                               |                                               |                                                            |                                                |                                                | X                                                           |
| <i>Ramdomisati on criterion</i>                             |                                                                       | X                                      |                                                                 |                                                        |                                               |                                               |                                                            |                                                |                                                |                                                             |
| <i>Randomisatio n</i>                                       |                                                                       |                                        | X                                                               |                                                        |                                               |                                               |                                                            |                                                |                                                |                                                             |
| <i>BTI Injections or Sham procedure</i>                     |                                                                       |                                        | X                                                               |                                                        |                                               |                                               |                                                            |                                                |                                                |                                                             |
| <i>Notification of care (surgery or other)</i>              |                                                                       |                                        | X                                                               |                                                        |                                               |                                               |                                                            |                                                |                                                |                                                             |
| <i>Establishment of standardized physiotherapy follw-up</i> |                                                                       |                                        | X                                                               |                                                        |                                               |                                               |                                                            |                                                |                                                |                                                             |
| <i>Follow-up of physiotherapy</i>                           |                                                                       |                                        |                                                                 | X                                                      | X                                             | X                                             | X                                                          | X                                              | X                                              | X                                                           |

|                       |  |   |   |   |   |   |   |   |   |   |
|-----------------------|--|---|---|---|---|---|---|---|---|---|
| <i>Adverse Events</i> |  | X | X | X | X | X | X | X | X | X |
| <i>Unblinding</i>     |  |   |   |   |   |   |   |   |   | X |

X\* → : Will be carried out before MRI

Figure 1 : Flow chart

For peer review only



### **Acknowledgements**

The authors acknowledge Chloe Bureau, Bhushan Borotikar, Céline Dolou, Valentine Guiton, Mélanie Pelouin, Emmanuel Novak for their help in building this project and Johanna Robertson for her help in revising English.

### **Author contribution**

CP and SB conceived the study and defined the original study protocol. NQ, FF, CP and SB developed the intervention parameters. MG and DBS defined the radiological parameters and developed radiological protocols. ED is responsible for the ethics applications and the ethical reporting of the study. FF, NQ, CP, LH, are responsible for recruitment, data collection and implementation of the study. GG is responsible for the study methodology. POPBtox group involves physicians who are only implicated for recruitment and data collection.

All authors have read and approved the final manuscript. CP, ED and SB drafted the final version of this manuscript

### **Funding**

This work was supported by a French national PHRC 15 -282

### **Disclaimer**

The funding body is not involved in the study design, data collection, management, analysis, and interpretation of data. The authors have the ultimate authority over these activities.

**Competing interests** Dr Pons reports non-financial support from Biogen, outside the submitted work. Dr. Brochard reports non-financial support from Allergan, outside the submitted work. Dr. Le Gal reports other from Portola Pharmaceuticals, other from Boehringer-Ingelheim, other from Pfizer, other from Bristol-Myers Squibb, other from LEO Pharma, other from Daiichi Sankyo, other from Bayer, other from Bayer, other from Pfizer, other from LEO Pharma, other from Sanofi, other from bioMérieux, outside the submitted work.

### **Sponsor**

Brest CHRU, 2 avenue Foch, 29200 Brest, France

### **Ethics approval**

The Ouest 1 Research Ethics Committee (n° 2015-R22) and ANSM (151357A-31) approved the protocol.

### **Data sharing statement**

In accordance with the protocol, the study data will be published.

The POPB-TOX Group included Marianne Alison, Madeleine Aslan, Jennifer Bastien, Gilles Dautel, Floriane Colin, Marion Delpont, Bruno Dohin, Marie Agnes Galloy, Vincent Gautheron Salem Hassan Al Khoury, Pascal Jehanno, Mélanie Kaas, Olivier Prodhomme, Mélanie Porte, Anne Gaele Py, Hélène Rauscent, Emilie Rumilly, Katherine Sanchez Barr, Catherine Tréguier, and Philippe Violas.

## REFERENCES

- 1 Chauhan SP, Blackwell SB, Ananth CV. Neonatal brachial plexus palsy: incidence, prevalence, and temporal trends. *Semin Perinatol* 2014;**38**:210–8. doi:10.1053/j.semperi.2014.04.007
- 2 Hoeksma AF, ter Steeg AM, Nelissen RGHH, *et al.* Neurological recovery in obstetric brachial plexus injuries: an historical cohort study. *Dev Med Child Neurol* 2004;**46**:76–83.
- 3 Julka A, Vander Have KL. Shoulder sequelae of neonatal brachial plexus injuries: orthopedic assessment and management. *J Pediatr Rehabil Med* 2011;**4**:131–40. doi:10.3233/PRM-2011-0165
- 4 Zafeiriou DI, Psychogiou K. Obstetrical brachial plexus palsy. *Pediatr Neurol* 2008;**38**:235–42. doi:10.1016/j.pediatrneurol.2007.09.013
- 5 Pearl ML. Shoulder problems in children with brachial plexus birth palsy: evaluation and management. *J Am Acad Orthop Surg* 2009;**17**:242–54.
- 6 Van Gelein Vtringa VM, Jaspers R, Mullender M, *et al.* Early effects of muscle atrophy on shoulder joint development in infants with unilateral birth brachial plexus injury. *Dev Med Child Neurol* 2011;**53**:173–8. doi:10.1111/j.1469-8749.2010.03783.x
- 7 van der Sluijs JA, van Ouwerkerk WJ, de Gast A, *et al.* Deformities of the shoulder in infants younger than 12 months with an obstetric lesion of the brachial plexus. *J Bone Joint Surg Br* 2001;**83**:551–5.
- 8 van der Sluijs JA, van Ouwerkerk WJR, Manoliu RA, *et al.* Secondary deformities of the shoulder in infants with an obstetrical brachial plexus lesions considered for neurosurgical treatment. *Neurosurg Focus* 2004;**16**:E9.
- 9 Waters PM. Update on management of pediatric brachial plexus palsy. *J Pediatr Orthop B* 2005;**14**:233–44.
- 10 Pöyhiä TH, Nietosvaara YA, Remes VM, *et al.* MRI of rotator cuff muscle atrophy in relation to glenohumeral joint incongruence in brachial plexus birth injury. *Pediatr Radiol* 2005;**35**:402–9. doi:10.1007/s00247-004-1377-3
- 11 Crouch DL, Plate JF, Li Z, *et al.* Computational sensitivity analysis to identify muscles that can mechanically contribute to shoulder deformity following brachial plexus birth palsy. *J Hand Surg Am* 2014;**39**:303–11. doi:10.1016/j.jhsa.2013.10.027
- 12 Kleiber T, Popovic N, Bahm J, *et al.* A modeling approach to compute modification of net joint forces caused by coping movements in obstetric brachial plexus palsy. *J Brachial Plex Peripher Nerve Inj* 2013;**8**:10. doi:10.1186/1749-7221-8-10
- 13 Moukoko D, Ezaki M, Wilkes D, *et al.* Posterior shoulder dislocation in infants with neonatal brachial plexus palsy. *J Bone Joint Surg Am* 2004;**86-A**:787–93.
- 14 Partridge C, Edwards S. Obstetric brachial plexus palsy: increasing disability and exacerbation of symptoms with age. *Physiother Res Int* 2004;**9**:157–63.
- 15 Kirkos JM, Kyrkos MJ, Kapetanios GA, *et al.* Brachial plexus palsy secondary to birth injuries. *J Bone Joint Surg Br* 2005;**87**:231–5.
- 16 Hulleberg G, Elvrum A-KG, Brandal M, *et al.* Outcome in adolescence of brachial plexus birth palsy. 69 individuals re-examined after 10–20 years. *Acta Orthop* 2014;**85**:633–

1  
2  
3 40. doi:10.3109/17453674.2014.964614

4 17 Squitieri L, Larson BP, Chang KWC, *et al.* Understanding quality of life and patient  
5 expectations among adolescents with neonatal brachial plexus palsy: a qualitative and  
6 quantitative pilot study. *J Hand Surg Am* 2013;**38**:2387-2397.e2.

7 18 Novak I, McIntyre S, Morgan C, *et al.* A systematic review of interventions for  
8 children with cerebral palsy: state of the evidence. *Dev Med Child Neurol* 2013;**55**:885–910.  
9 doi:10.1111/dmcn.12246

10 19 Ruchelsman DE, Pettrone S, Price AE, *et al.* Brachial plexus birth palsy: an overview  
11 of early treatment considerations. *Bull NYU Hosp Jt Dis* 2009;**67**:83–9.

12 20 Gobets D, Beckerman H, de Groot V, *et al.* Indications and effects of botulinum toxin  
13 A for obstetric brachial plexus injury: a systematic literature review. *Dev Med Child Neurol*  
14 2010;**52**:517–28. doi:10.1111/j.1469-8749.2009.03607.x

15 21 Brochard S, Alter K, Damiano D. Shoulder strength profiles in children with and  
16 without brachial PLEXUS PALSY. *Muscle Nerve* 2014;**50**:60–6. doi:10.1002/mus.24099

17 22 Ezaki M, Malungpaishrope K, Harrison RJ, *et al.* Onabotulinum toxinA injection as an  
18 adjunct in the treatment of posterior shoulder subluxation in neonatal brachial plexus palsy. *J*  
19 *Bone Joint Surg Am* 2010;**92**:2171–7. doi:10.2106/JBJS.I.00499

20 23 Michaud LJ, Loudon EJ, Lippert WC, *et al.* Use of botulinum toxin type A in the  
21 management of neonatal brachial plexus palsy. *PM R* 2014;**6**:1107–19.  
22 doi:10.1016/j.pmrj.2014.05.002

23 24 Shin YB, Shin MJ, Chang JH, *et al.* Effects of Botulinum Toxin on Reducing the Co-  
24 contraction of Antagonists in Birth Brachial Plexus Palsy. *Ann Rehabil Med* 2014;**38**:127–31.  
25 doi:10.5535/arm.2014.38.1.127

26 25 Bourseul J-S, Molina A, Lintanf M, *et al.* Early Botulinum Toxin Injections in Infants  
27 With Musculoskeletal Disorders: A Systematic Review of Safety and Effectiveness. *Arch*  
28 *Phys Med Rehabil* Published Online First: 27 December 2017.  
29 doi:10.1016/j.apmr.2017.11.013

30 26 Williams SA, Reid S, Elliott C, *et al.* Muscle volume alterations in spastic muscles  
31 immediately following botulinum toxin type-A treatment in children with cerebral palsy. *Dev*  
32 *Med Child Neurol* 2013;**55**:813–20. doi:10.1111/dmcn.12200

33 27 Pons C, Sheehan FT, Im HS, *et al.* Shoulder muscle atrophy and its relation to strength  
34 loss in obstetrical brachial plexus palsy. *Clin Biomech (Bristol, Avon)* 2017;**48**:80–7.  
35 doi:10.1016/j.clinbiomech.2017.07.010

36 28 Kamath S, Venkatanarasimha N, Walsh MA, *et al.* MRI appearance of muscle  
37 denervation. *Skeletal Radiology* 2008;**37**:397–404. doi:10.1007/s00256-007-0409-0

38 29 Bialocerkowski A, Kurlowicz K, Vladusic S, *et al.* Effectiveness of primary  
39 conservative management for infants with obstetric brachial plexus palsy. *Int J Evid Based*  
40 *Healthc* 2005;**3**:27–44. doi:10.1111/j.1479-6988.2005.00020.x

41 30 Justice D, Rasmussen L, Di Pietro M, *et al.* Prevalence of Posterior Shoulder  
42 Subluxation in Children With Neonatal Brachial Plexus Palsy After Early Full Passive Range  
43 of Motion Exercises. *PM R* 2015;**7**:1235–42. doi:10.1016/j.pmrj.2015.05.013

44 31 Papavasiliou AS, Nikaina I, Foska K, *et al.* Safety of Botulinum Toxin A in Children  
45 and Adolescents with Cerebral Palsy in a Pragmatic Setting. *Toxins (Basel)* 2013;**5**:524–36.  
46 doi:10.3390/toxins5030524

47 32 Albavera-Hernández C, Rodríguez JM, Idrovo AJ. Safety of botulinum toxin type A  
48 among children with spasticity secondary to cerebral palsy: a systematic review of  
49 randomized clinical trials. *Clin Rehabil* 2009;**23**:394–407. doi:10.1177/0269215508099860

50 33 Dahan-Oliel N, Kasaai B, Montpetit K, *et al.* Effectiveness and safety of botulinum  
51 toxin type a in children with musculoskeletal conditions: what is the current state of evidence?  
52 *Int J Pediatr* 2012;**2012**:898924. doi:10.1155/2012/898924  
53  
54  
55  
56  
57  
58  
59  
60

- 1  
2  
3 34 Desiato MT, Risina B. The role of botulinum toxin in the neuro-rehabilitation of  
4 young patients with brachial plexus birth palsy. *Pediatr Rehabil* 2001;**4**:29–36.  
5  
6 35 Fortuna R, Vaz MA, Youssef AR, *et al*. Changes in contractile properties of muscles  
7 receiving repeat injections of botulinum toxin (Botox). *J Biomech* 2011;**44**:39–44.  
8 doi:10.1016/j.jbiomech.2010.08.020  
9  
10 36 Schroeder AS, Ertl-Wagner B, Britsch S, *et al*. Muscle biopsy substantiates long-term  
11 MRI alterations one year after a single dose of botulinum toxin injected into the lateral  
12 gastrocnemius muscle of healthy volunteers. *Mov Disord* 2009;**24**:1494–503.  
13 doi:10.1002/mds.22661  
14  
15 37 H Kozin S. Correlation Between External Rotation of the Glenohumeral Joint and  
16 Deformity after Brachial Plexus Birth Palsy. *Journal of pediatric orthopedics* 2004;**24**:189–  
17 93. doi:10.1097/01241398-200403000-00011  
18  
19 38 Lippert WC, Mehlman CT, Cornwall R, *et al*. The intrarater and interrater reliability  
20 of glenoid version and glenohumeral subluxation measurements in neonatal brachial plexus  
21 palsy. *J Pediatr Orthop* 2012;**32**:378–84. doi:10.1097/BPO.0b013e31825611bd  
22  
23 39 Waters PM, Smith GR, Jaramillo D. Glenohumeral deformity secondary to brachial  
24 plexus birth palsy. *J Bone Joint Surg Am* 1998;**80**:668–77.  
25  
26 40 Friedman RJ, Hawthorne KB, Genez BM. The use of computerized tomography in the  
27 measurement of glenoid version. *J Bone Joint Surg Am* 1992;**74**:1032–7.  
28  
29 41 Brochard S, Mazingo JD, Alter KE, *et al*. Three dimensionality of gleno-humeral  
30 deformities in obstetrical brachial plexus palsy. *J Orthop Res* 2016;**34**:675–82.  
31 doi:10.1002/jor.23049  
32  
33 42 Curtis C, Stephens D, Clarke HM, *et al*. The active movement scale: an evaluative tool  
34 for infants with obstetrical brachial plexus palsy. *J Hand Surg Am* 2002;**27**:470–8.  
35  
36 43 Bialocerkowski A, O'shea K, Pin TW. Psychometric properties of outcome measures  
37 for children and adolescents with brachial plexus birth palsy: a systematic review. *Dev Med*  
38 *Child Neurol* 2013;**55**:1075–88. doi:10.1111/dmcn.12194  
39  
40 44 Greaves S, Imms C, Dodd K, *et al*. Development of the Mini-Assisting Hand  
41 Assessment: evidence for content and internal scale validity. *Dev Med Child Neurol*  
42 2013;**55**:1030–7. doi:10.1111/dmcn.12212  
43  
44 45 Hogendoorn S, van Overvest KLJ, Watt I, *et al*. Structural changes in muscle and  
45 glenohumeral joint deformity in neonatal brachial plexus palsy. *J Bone Joint Surg Am*  
46 2010;**92**:935–42. doi:10.2106/JBJS.I.00193  
47  
48 46 Fehlings D, Novak I, Berweck S, *et al*. Botulinum toxin assessment, intervention and  
49 follow-up for paediatric upper limb hypertonicity: international consensus statement. *Eur J*  
50 *Neurol* 2010;**17 Suppl 2**:38–56. doi:10.1111/j.1468-1331.2010.03127.x  
51  
52 47 Anguelova GV, de Vlught E, Vardy AN, *et al*. Cocontraction measured with short-  
53 range stiffness was higher in obstetric brachial plexus lesions patients compared to healthy  
54 subjects. *Journal of Biomechanics* 2017;**63**:192–6. doi:10.1016/j.jbiomech.2017.08.015  
55  
56  
57  
58  
59  
60



Figure 1 : Flow chart

1360x789mm (72 x 72 DPI)

### Supplementary file 1: Botulinum toxin injections procedure

The Botox will be injected intramuscularly by transcutaneous approach using a 27 gauge, 25mm long sterile needle. This information can be added in the main text.

In the study protocol, we specifically described the procedure to ensure standardization (provided below). We propose to add this as supplementary material in the article.

“One hour before the injections, preliminary ultrasound identification will be carried out so that anaesthetic cream can be applied to the skin over the future injection sites.

For all injections, the child will be held in the arms of one of his/her parents.

**Teres Major:**

The parent will recline on the examination table, with the baby in his/her arms facing him/her (“belly to belly”). The sleep mask will be positioned on the parent at this time to ensure the blinding. The paediatric auxiliary can help to hold the child if necessary. The teres major muscle will be located by ultrasound, and the skin disinfected. Injection and/or simulation of the injection of the muscle (sham procedure) will be performed using a 27 gauge, 25mm long sterile needle. The ultrasound probe may be held by the nurse during the injection. After the injection, the skin will be cleansed with saline, and systematically covered with a dressing.

**Subscapularis:**

The baby will remain in the arms of the parent, “belly to belly”. The arm on the injected side will be placed in maximum abduction by the paediatric auxiliary. The subscapularis muscle will be identified by ultrasound. The skin will be disinfected. Injection and/or simulation of the injection of the muscle will be performed (sham procedure) using a 27 gauge, 25mm long sterile needle. The ultrasound probe may be held by the nurse during the injection. After the injection, the skin will be cleansed with saline, and systematically covered with a dressing.

**Pectoralis Major:**

The face mask will be removed so that the parent can change position and the position of the baby can be changed. The parent will sit in a chair with the child on his/her lap in a sitting position. The face mask will be repositioned. The pectoralis major muscle will be identified by ultrasound. The skin will be disinfected. Injection and/or simulation of the injection of the muscle (sham procedure) will be performed using a 27 gauge, 25mm long sterile needle. The ultrasound probe may be held by the nurse during the injection. After the injection, the skin will be cleansed with saline, and systematically covered with a dressing.”





SPIRIT 2013 Checklist: Recommended items to address in a clinical trial protocol and related documents\*

| Section/item                      | Item No | Description                                                                                                                                                                                                                                                                              | Addressed on page number |
|-----------------------------------|---------|------------------------------------------------------------------------------------------------------------------------------------------------------------------------------------------------------------------------------------------------------------------------------------------|--------------------------|
| <b>Administrative information</b> |         |                                                                                                                                                                                                                                                                                          |                          |
| Title                             | 1       | Descriptive title identifying the study design, population, interventions, and, if applicable, trial acronym                                                                                                                                                                             | P1                       |
| Trial registration                | 2a      | Trial identifier and registry name. If not yet registered, name of intended registry                                                                                                                                                                                                     | P5                       |
|                                   | 2b      | All items from the World Health Organization Trial Registration Data Set                                                                                                                                                                                                                 | P5                       |
| Protocol version                  | 3       | Date and version identifier                                                                                                                                                                                                                                                              | P5                       |
| Funding                           | 4       | Sources and types of financial, material, and other support                                                                                                                                                                                                                              | P19                      |
| Roles and responsibilities        | 5a      | Names, affiliations, and roles of protocol contributors                                                                                                                                                                                                                                  | P1 and 19                |
|                                   | 5b      | Name and contact information for the trial sponsor                                                                                                                                                                                                                                       | P5 and 19                |
|                                   | 5c      | Role of study sponsor and funders, if any, in study design; collection, management, analysis, and interpretation of data; writing of the report; and the decision to submit the report for publication, including whether they will have ultimate authority over any of these activities | P19                      |
|                                   | 5d      | Composition, roles, and responsibilities of the coordinating centre, steering committee, endpoint adjudication committee, data management team, and other individuals or groups overseeing the trial, if applicable (see Item 21a for data monitoring committee)                         | P11 and 13-14            |

**Introduction**



|    |                                                           |     |                                                                                                                                                                                                                                                                                                                                                                                |                   |
|----|-----------------------------------------------------------|-----|--------------------------------------------------------------------------------------------------------------------------------------------------------------------------------------------------------------------------------------------------------------------------------------------------------------------------------------------------------------------------------|-------------------|
| 1  | Background and rationale                                  | 6a  | Description of research question and justification for undertaking the trial, including summary of relevant studies (published and unpublished) examining benefits and harms for each intervention                                                                                                                                                                             | P3-4              |
| 2  |                                                           |     |                                                                                                                                                                                                                                                                                                                                                                                |                   |
| 3  |                                                           |     |                                                                                                                                                                                                                                                                                                                                                                                |                   |
| 4  |                                                           | 6b  | Explanation for choice of comparators                                                                                                                                                                                                                                                                                                                                          | P4                |
| 5  |                                                           |     |                                                                                                                                                                                                                                                                                                                                                                                |                   |
| 6  | Objectives                                                | 7   | Specific objectives or hypotheses                                                                                                                                                                                                                                                                                                                                              | P4-5              |
| 7  |                                                           |     |                                                                                                                                                                                                                                                                                                                                                                                |                   |
| 8  | Trial design                                              | 8   | Description of trial design including type of trial (eg, parallel group, crossover, factorial, single group), allocation ratio, and framework (eg, superiority, equivalence, noninferiority, exploratory)                                                                                                                                                                      | P5                |
| 9  |                                                           |     |                                                                                                                                                                                                                                                                                                                                                                                |                   |
| 10 |                                                           |     |                                                                                                                                                                                                                                                                                                                                                                                |                   |
| 11 |                                                           |     |                                                                                                                                                                                                                                                                                                                                                                                |                   |
| 12 | <b>Methods: Participants, interventions, and outcomes</b> |     |                                                                                                                                                                                                                                                                                                                                                                                |                   |
| 13 |                                                           |     |                                                                                                                                                                                                                                                                                                                                                                                |                   |
| 14 | Study setting                                             | 9   | Description of study settings (eg, community clinic, academic hospital) and list of countries where data will be collected. Reference to where list of study sites can be obtained                                                                                                                                                                                             | P5                |
| 15 |                                                           |     |                                                                                                                                                                                                                                                                                                                                                                                |                   |
| 16 |                                                           |     |                                                                                                                                                                                                                                                                                                                                                                                |                   |
| 17 | Eligibility criteria                                      | 10  | Inclusion and exclusion criteria for participants. If applicable, eligibility criteria for study centres and individuals who will perform the interventions (eg, surgeons, psychotherapists)                                                                                                                                                                                   | P6                |
| 18 |                                                           |     |                                                                                                                                                                                                                                                                                                                                                                                |                   |
| 19 |                                                           |     |                                                                                                                                                                                                                                                                                                                                                                                |                   |
| 20 | Interventions                                             | 11a | Interventions for each group with sufficient detail to allow replication, including how and when they will be administered                                                                                                                                                                                                                                                     | P8-9              |
| 21 |                                                           |     |                                                                                                                                                                                                                                                                                                                                                                                |                   |
| 22 |                                                           |     |                                                                                                                                                                                                                                                                                                                                                                                |                   |
| 23 |                                                           | 11b | Criteria for discontinuing or modifying allocated interventions for a given trial participant (eg, drug dose change in response to harms, participant request, or improving/worsening disease)                                                                                                                                                                                 | NA_               |
| 24 |                                                           |     |                                                                                                                                                                                                                                                                                                                                                                                |                   |
| 25 |                                                           |     |                                                                                                                                                                                                                                                                                                                                                                                |                   |
| 26 |                                                           | 11c | Strategies to improve adherence to intervention protocols, and any procedures for monitoring adherence (eg, drug tablet return, laboratory tests)                                                                                                                                                                                                                              | P14               |
| 27 |                                                           |     |                                                                                                                                                                                                                                                                                                                                                                                |                   |
| 28 |                                                           |     |                                                                                                                                                                                                                                                                                                                                                                                |                   |
| 29 |                                                           |     |                                                                                                                                                                                                                                                                                                                                                                                |                   |
| 30 |                                                           | 11d | Relevant concomitant care and interventions that are permitted or prohibited during the trial                                                                                                                                                                                                                                                                                  | P9                |
| 31 |                                                           |     |                                                                                                                                                                                                                                                                                                                                                                                |                   |
| 32 | Outcomes                                                  | 12  | Primary, secondary, and other outcomes, including the specific measurement variable (eg, systolic blood pressure), analysis metric (eg, change from baseline, final value, time to event), method of aggregation (eg, median, proportion), and time point for each outcome. Explanation of the clinical relevance of chosen efficacy and harm outcomes is strongly recommended | P11-13            |
| 33 |                                                           |     |                                                                                                                                                                                                                                                                                                                                                                                |                   |
| 34 |                                                           |     |                                                                                                                                                                                                                                                                                                                                                                                |                   |
| 35 |                                                           |     |                                                                                                                                                                                                                                                                                                                                                                                |                   |
| 36 |                                                           |     |                                                                                                                                                                                                                                                                                                                                                                                |                   |
| 37 | Participant timeline                                      | 13  | Time schedule of enrolment, interventions (including any run-ins and washouts), assessments, and visits for participants. A schematic diagram is highly recommended (see Figure)                                                                                                                                                                                               | P6-7 fig1, table1 |
| 38 |                                                           |     |                                                                                                                                                                                                                                                                                                                                                                                |                   |
| 39 |                                                           |     |                                                                                                                                                                                                                                                                                                                                                                                |                   |
| 40 |                                                           |     |                                                                                                                                                                                                                                                                                                                                                                                |                   |
| 41 |                                                           |     |                                                                                                                                                                                                                                                                                                                                                                                |                   |
| 42 |                                                           |     |                                                                                                                                                                                                                                                                                                                                                                                |                   |
| 43 |                                                           |     |                                                                                                                                                                                                                                                                                                                                                                                |                   |
| 44 |                                                           |     |                                                                                                                                                                                                                                                                                                                                                                                |                   |
| 45 |                                                           |     |                                                                                                                                                                                                                                                                                                                                                                                |                   |
| 46 |                                                           |     |                                                                                                                                                                                                                                                                                                                                                                                |                   |

|   |             |    |                                                                                                                                                                                       |        |
|---|-------------|----|---------------------------------------------------------------------------------------------------------------------------------------------------------------------------------------|--------|
| 1 | Sample size | 14 | Estimated number of participants needed to achieve study objectives and how it was determined, including clinical and statistical assumptions supporting any sample size calculations | P14-15 |
| 2 |             |    |                                                                                                                                                                                       |        |
| 3 |             |    |                                                                                                                                                                                       |        |
| 4 | Recruitment | 15 | Strategies for achieving adequate participant enrolment to reach target sample size                                                                                                   | P5     |
| 5 |             |    |                                                                                                                                                                                       |        |

### 6 **Methods: Assignment of interventions (for controlled trials)**

#### 7 Allocation:

|    |                    |     |                                                                                                                                                                                                                                                                                                                                                          |      |
|----|--------------------|-----|----------------------------------------------------------------------------------------------------------------------------------------------------------------------------------------------------------------------------------------------------------------------------------------------------------------------------------------------------------|------|
| 8  |                    |     |                                                                                                                                                                                                                                                                                                                                                          |      |
| 9  |                    |     |                                                                                                                                                                                                                                                                                                                                                          |      |
| 10 | Sequence           | 16a | Method of generating the allocation sequence (eg, computer-generated random numbers), and list of any factors for stratification. To reduce predictability of a random sequence, details of any planned restriction (eg, blocking) should be provided in a separate document that is unavailable to those who enrol participants or assign interventions | P7-8 |
| 11 | generation         |     |                                                                                                                                                                                                                                                                                                                                                          |      |
| 12 |                    |     |                                                                                                                                                                                                                                                                                                                                                          |      |
| 13 |                    |     |                                                                                                                                                                                                                                                                                                                                                          |      |
| 14 |                    |     |                                                                                                                                                                                                                                                                                                                                                          |      |
| 15 |                    |     |                                                                                                                                                                                                                                                                                                                                                          |      |
| 16 | Allocation         | 16b | Mechanism of implementing the allocation sequence (eg, central telephone; sequentially numbered, opaque, sealed envelopes), describing any steps to conceal the sequence until interventions are assigned                                                                                                                                                | P8   |
| 17 | concealment        |     |                                                                                                                                                                                                                                                                                                                                                          |      |
| 18 | mechanism          |     |                                                                                                                                                                                                                                                                                                                                                          |      |
| 19 |                    |     |                                                                                                                                                                                                                                                                                                                                                          |      |
| 20 | Implementation     | 16c | Who will generate the allocation sequence, who will enrol participants, and who will assign participants to interventions                                                                                                                                                                                                                                | P8   |
| 21 |                    |     |                                                                                                                                                                                                                                                                                                                                                          |      |
| 22 |                    |     |                                                                                                                                                                                                                                                                                                                                                          |      |
| 23 |                    |     |                                                                                                                                                                                                                                                                                                                                                          |      |
| 24 | Blinding (masking) | 17a | Who will be blinded after assignment to interventions (eg, trial participants, care providers, outcome assessors, data analysts), and how                                                                                                                                                                                                                | P8   |
| 25 |                    |     |                                                                                                                                                                                                                                                                                                                                                          |      |
| 26 |                    |     |                                                                                                                                                                                                                                                                                                                                                          |      |
| 27 |                    | 17b | If blinded, circumstances under which unblinding is permissible, and procedure for revealing a participant's allocated intervention during the trial                                                                                                                                                                                                     | P10  |
| 28 |                    |     |                                                                                                                                                                                                                                                                                                                                                          |      |
| 29 |                    |     |                                                                                                                                                                                                                                                                                                                                                          |      |
| 30 |                    |     |                                                                                                                                                                                                                                                                                                                                                          |      |

### 31 **Methods: Data collection, management, and analysis**

|    |                 |     |                                                                                                                                                                                                                                                                                                                                                                                                              |            |
|----|-----------------|-----|--------------------------------------------------------------------------------------------------------------------------------------------------------------------------------------------------------------------------------------------------------------------------------------------------------------------------------------------------------------------------------------------------------------|------------|
| 32 |                 |     |                                                                                                                                                                                                                                                                                                                                                                                                              |            |
| 33 | Data collection | 18a | Plans for assessment and collection of outcome, baseline, and other trial data, including any related processes to promote data quality (eg, duplicate measurements, training of assessors) and a description of study instruments (eg, questionnaires, laboratory tests) along with their reliability and validity, if known. Reference to where data collection forms can be found, if not in the protocol | P8, P11-13 |
| 34 | methods         |     |                                                                                                                                                                                                                                                                                                                                                                                                              |            |
| 35 |                 |     |                                                                                                                                                                                                                                                                                                                                                                                                              |            |
| 36 |                 |     |                                                                                                                                                                                                                                                                                                                                                                                                              |            |
| 37 |                 |     |                                                                                                                                                                                                                                                                                                                                                                                                              |            |
| 38 |                 | 18b | Plans to promote participant retention and complete follow-up, including list of any outcome data to be collected for participants who discontinue or deviate from intervention protocols                                                                                                                                                                                                                    | P15        |
| 39 |                 |     |                                                                                                                                                                                                                                                                                                                                                                                                              |            |
| 40 |                 |     |                                                                                                                                                                                                                                                                                                                                                                                                              |            |
| 41 |                 |     |                                                                                                                                                                                                                                                                                                                                                                                                              |            |
| 42 |                 |     |                                                                                                                                                                                                                                                                                                                                                                                                              |            |

|    |                                 |     |                                                                                                                                                                                                                                                                                                                                       |              |
|----|---------------------------------|-----|---------------------------------------------------------------------------------------------------------------------------------------------------------------------------------------------------------------------------------------------------------------------------------------------------------------------------------------|--------------|
| 1  | Data management                 | 19  | Plans for data entry, coding, security, and storage, including any related processes to promote data quality (eg, double data entry; range checks for data values). Reference to where details of data management procedures can be found, if not in the protocol                                                                     | P13-14       |
| 2  |                                 |     |                                                                                                                                                                                                                                                                                                                                       |              |
| 3  |                                 |     |                                                                                                                                                                                                                                                                                                                                       |              |
| 4  |                                 |     |                                                                                                                                                                                                                                                                                                                                       |              |
| 5  | Statistical methods             | 20a | Statistical methods for analysing primary and secondary outcomes. Reference to where other details of the statistical analysis plan can be found, if not in the protocol                                                                                                                                                              | P14-15       |
| 6  |                                 |     |                                                                                                                                                                                                                                                                                                                                       |              |
| 7  |                                 |     |                                                                                                                                                                                                                                                                                                                                       |              |
| 8  |                                 | 20b | Methods for any additional analyses (eg, subgroup and adjusted analyses)                                                                                                                                                                                                                                                              | P14-15       |
| 9  |                                 |     |                                                                                                                                                                                                                                                                                                                                       |              |
| 10 |                                 | 20c | Definition of analysis population relating to protocol non-adherence (eg, as randomised analysis), and any statistical methods to handle missing data (eg, multiple imputation)                                                                                                                                                       | P15          |
| 11 |                                 |     |                                                                                                                                                                                                                                                                                                                                       |              |
| 12 |                                 |     |                                                                                                                                                                                                                                                                                                                                       |              |
| 13 |                                 |     |                                                                                                                                                                                                                                                                                                                                       |              |
| 14 | <b>Methods: Monitoring</b>      |     |                                                                                                                                                                                                                                                                                                                                       |              |
| 15 |                                 |     |                                                                                                                                                                                                                                                                                                                                       |              |
| 16 | Data monitoring                 | 21a | Composition of data monitoring committee (DMC); summary of its role and reporting structure; statement of whether it is independent from the sponsor and competing interests; and reference to where further details about its charter can be found, if not in the protocol. Alternatively, an explanation of why a DMC is not needed | P11          |
| 17 |                                 |     |                                                                                                                                                                                                                                                                                                                                       |              |
| 18 |                                 |     |                                                                                                                                                                                                                                                                                                                                       |              |
| 19 |                                 |     |                                                                                                                                                                                                                                                                                                                                       |              |
| 20 |                                 |     |                                                                                                                                                                                                                                                                                                                                       |              |
| 21 |                                 |     |                                                                                                                                                                                                                                                                                                                                       |              |
| 22 |                                 | 21b | Description of any interim analyses and stopping guidelines, including who will have access to these interim results and make the final decision to terminate the trial                                                                                                                                                               | NA           |
| 23 |                                 |     |                                                                                                                                                                                                                                                                                                                                       |              |
| 24 |                                 |     |                                                                                                                                                                                                                                                                                                                                       |              |
| 25 | Harms                           | 22  | Plans for collecting, assessing, reporting, and managing solicited and spontaneously reported adverse events and other unintended effects of trial interventions or trial conduct                                                                                                                                                     | P7, P10, P13 |
| 26 |                                 |     |                                                                                                                                                                                                                                                                                                                                       |              |
| 27 |                                 |     |                                                                                                                                                                                                                                                                                                                                       |              |
| 28 | Auditing                        | 23  | Frequency and procedures for auditing trial conduct, if any, and whether the process will be independent from investigators and the sponsor                                                                                                                                                                                           | P13-14       |
| 29 |                                 |     |                                                                                                                                                                                                                                                                                                                                       |              |
| 30 |                                 |     |                                                                                                                                                                                                                                                                                                                                       |              |
| 31 |                                 |     |                                                                                                                                                                                                                                                                                                                                       |              |
| 32 | <b>Ethics and dissemination</b> |     |                                                                                                                                                                                                                                                                                                                                       |              |
| 33 |                                 |     |                                                                                                                                                                                                                                                                                                                                       |              |
| 34 | Research ethics approval        | 24  | Plans for seeking research ethics committee/institutional review board (REC/IRB) approval                                                                                                                                                                                                                                             | P5           |
| 35 |                                 |     |                                                                                                                                                                                                                                                                                                                                       |              |
| 36 |                                 |     |                                                                                                                                                                                                                                                                                                                                       |              |
| 37 | Protocol amendments             | 25  | Plans for communicating important protocol modifications (eg, changes to eligibility criteria, outcomes, analyses) to relevant parties (eg, investigators, REC/IRBs, trial participants, trial registries, journals, regulators)                                                                                                      | P5           |
| 38 |                                 |     |                                                                                                                                                                                                                                                                                                                                       |              |
| 39 |                                 |     |                                                                                                                                                                                                                                                                                                                                       |              |
| 40 |                                 |     |                                                                                                                                                                                                                                                                                                                                       |              |
| 41 |                                 |     |                                                                                                                                                                                                                                                                                                                                       |              |
| 42 |                                 |     |                                                                                                                                                                                                                                                                                                                                       |              |
| 43 |                                 |     |                                                                                                                                                                                                                                                                                                                                       |              |
| 44 |                                 |     |                                                                                                                                                                                                                                                                                                                                       |              |
| 45 |                                 |     |                                                                                                                                                                                                                                                                                                                                       |              |
| 46 |                                 |     |                                                                                                                                                                                                                                                                                                                                       |              |

|    |                               |     |                                                                                                                                                                                                                                                                                     |               |
|----|-------------------------------|-----|-------------------------------------------------------------------------------------------------------------------------------------------------------------------------------------------------------------------------------------------------------------------------------------|---------------|
| 1  | Consent or assent             | 26a | Who will obtain informed consent or assent from potential trial participants or authorised surrogates, and how (see Item 32)                                                                                                                                                        | P6            |
| 2  |                               |     |                                                                                                                                                                                                                                                                                     |               |
| 3  |                               |     |                                                                                                                                                                                                                                                                                     |               |
| 4  |                               | 26b | Additional consent provisions for collection and use of participant data and biological specimens in ancillary studies, if applicable                                                                                                                                               | NA            |
| 5  |                               |     |                                                                                                                                                                                                                                                                                     |               |
| 6  |                               |     |                                                                                                                                                                                                                                                                                     |               |
| 7  | Confidentiality               | 27  | How personal information about potential and enrolled participants will be collected, shared, and maintained in order to protect confidentiality before, during, and after the trial                                                                                                | P13           |
| 8  |                               |     |                                                                                                                                                                                                                                                                                     |               |
| 9  |                               |     |                                                                                                                                                                                                                                                                                     |               |
| 10 | Declaration of interests      | 28  | Financial and other competing interests for principal investigators for the overall trial and each study site                                                                                                                                                                       | P19           |
| 11 |                               |     |                                                                                                                                                                                                                                                                                     |               |
| 12 |                               |     |                                                                                                                                                                                                                                                                                     |               |
| 13 | Access to data                | 29  | Statement of who will have access to the final trial dataset, and disclosure of contractual agreements that limit such access for investigators                                                                                                                                     | P13-14        |
| 14 |                               |     |                                                                                                                                                                                                                                                                                     |               |
| 15 |                               |     |                                                                                                                                                                                                                                                                                     |               |
| 16 | Ancillary and post-trial care | 30  | Provisions, if any, for ancillary and post-trial care, and for compensation to those who suffer harm from trial participation                                                                                                                                                       | NA            |
| 17 |                               |     |                                                                                                                                                                                                                                                                                     |               |
| 18 |                               |     |                                                                                                                                                                                                                                                                                     |               |
| 19 |                               |     |                                                                                                                                                                                                                                                                                     |               |
| 20 | Dissemination policy          | 31a | Plans for investigators and sponsor to communicate trial results to participants, healthcare professionals, the public, and other relevant groups (eg, via publication, reporting in results databases, or other data sharing arrangements), including any publication restrictions | P19           |
| 21 |                               |     |                                                                                                                                                                                                                                                                                     |               |
| 22 |                               |     |                                                                                                                                                                                                                                                                                     |               |
| 23 |                               |     |                                                                                                                                                                                                                                                                                     |               |
| 24 |                               | 31b | Authorship eligibility guidelines and any intended use of professional writers                                                                                                                                                                                                      | NA            |
| 25 |                               |     |                                                                                                                                                                                                                                                                                     |               |
| 26 |                               | 31c | Plans, if any, for granting public access to the full protocol, participant-level dataset, and statistical code                                                                                                                                                                     | NA            |
| 27 |                               |     |                                                                                                                                                                                                                                                                                     |               |
| 28 |                               |     |                                                                                                                                                                                                                                                                                     |               |
| 29 | <b>Appendices</b>             |     |                                                                                                                                                                                                                                                                                     |               |
| 30 |                               |     |                                                                                                                                                                                                                                                                                     |               |
| 31 | Informed consent materials    | 32  | Model consent form and other related documentation given to participants and authorised surrogates                                                                                                                                                                                  | SM for editor |
| 32 |                               |     |                                                                                                                                                                                                                                                                                     |               |
| 33 |                               |     |                                                                                                                                                                                                                                                                                     |               |
| 34 | Biological specimens          | 33  | Plans for collection, laboratory evaluation, and storage of biological specimens for genetic or molecular analysis in the current trial and for future use in ancillary studies, if applicable                                                                                      | NA            |
| 35 |                               |     |                                                                                                                                                                                                                                                                                     |               |
| 36 |                               |     |                                                                                                                                                                                                                                                                                     |               |

\*It is strongly recommended that this checklist be read in conjunction with the SPIRIT 2013 Explanation & Elaboration for important clarification on the items. Amendments to the protocol should be tracked and dated. The SPIRIT checklist is copyrighted by the SPIRIT Group under the Creative Commons [“Attribution-NonCommercial-NoDerivs 3.0 Unported”](https://creativecommons.org/licenses/by-nc-nd/3.0/) license.
