# Supplementary material for: Effectiveness and safety of early intramuscular botulinum toxin injections to prevent shoulder deformity in babies with brachial plexus birth injury (POPB-TOX), a randomised controlled trial: study protocol
Source: PubMed Central journal article supplement — BMJ Open. 2019 Sep 30;9(9):e032901. doi: 10.1136/bmjopen-2019-032901 (PMC6773354; doi:10.1136/bmjopen-2019-032901), 2019-09-30
Supplement: bmjopen-2019-032901supp001.pdf [file bmjopen-2019-032901supp001.pdf]

### Supplementary file 1: Botulinum toxin injections procedure

The Botox will be injected intramuscularly by transcutaneous approach using a 27 gauge, 25mm long sterile needle. This information can be added in the main text.

In the study protocol, we specifically described the procedure to ensure standardization (provided below). We propose to add this as supplementary material in the article.

“One hour before the injections, preliminary ultrasound identification will be carried out so that anaesthetic cream can be applied to the skin over the future injection sites.

For all injections, the child will be held in the arms of one of his/her parents.

**Teres Major:**

The parent will recline on the examination table, with the baby in his/her arms facing him/her (“belly to belly”). The sleep mask will be positioned on the parent at this time to ensure the blinding. The paediatric auxiliary can help to hold the child if necessary. The teres major muscle will be located by ultrasound, and the skin disinfected. Injection and/or simulation of the injection of the muscle (sham procedure) will be performed using a 27 gauge, 25mm long sterile needle. The ultrasound probe may be held by the nurse during the injection. After the injection, the skin will be cleansed with saline, and systematically covered with a dressing.

**Subscapularis:**

The baby will remain in the arms of the parent, “belly to belly”. The arm on the injected side will be placed in maximum abduction by the paediatric auxiliary. The subscapularis muscle will be identified by ultrasound. The skin will be disinfected. Injection and/or simulation of the injection of the muscle will be performed (sham procedure) using a 27 gauge, 25mm long sterile needle. The ultrasound probe may be held by the nurse during the injection. After the injection, the skin will be cleansed with saline, and systematically covered with a dressing.

**Pectoralis Major:**

The face mask will be removed so that the parent can change position and the position of the baby can be changed. The parent will sit in a chair with the child on his/her lap in a sitting position. The face mask will be repositioned. The pectoralis major muscle will be identified by ultrasound. The skin will be disinfected. Injection and/or simulation of the injection of the muscle (sham procedure) will be performed using a 27 gauge, 25mm long sterile needle. The ultrasound probe may be held by the nurse during the injection. After the injection, the skin will be cleansed with saline, and systematically covered with a dressing.”
